# Supplementary material for: Structures, energetics, and infrared spectra of the Cl––(H2S)n and Br––(H2S)n anion clusters from ab initio calculations
Source: Royal Society of Chemistry journal article supplement (doi:10.1039/b710111b), 2007-01-01
Supplement: b710111b.pdf [file b710111b.pdf]

## *Calculated data for $Br^-(H_2S)_n$ clusters ( $n=1-4$ )*

Key:

Calculations were performed at either the MP2/aug-cc-pvdz or MP2/aug-cc-pvtz levels of theory. The data are labeled pvdz or pvtz in the tables

Bond lengths are denoted  $r(A-B)$ , and are given in Ångström ( $10^{-10}$  metre)

Angles are denoted by  $\theta(A-B-C)$ , and are given in degrees

Zero point energy (zpe), given in kcal/mol

$E_{MP2}$  and  $E_{e/BSSE}$  are the electronic energies (MP2, and MP2 corrected for Basis Set Superposition Error), in units of hartrees.

$\Delta E_{e/BSSE}$  is the energy separation between stationary points of the same cluster size.  $\Delta E_{e/BSSE/Corr}$  is corrected for zpe differences, both are given in kcal/mol

$\Delta H_{n \rightarrow n+1}^{295K}$  is the enthalpy change for ligand association, in kcal/mol. This is also termed the ligand binding energy in the paper.

Vibrational data given in units of  $cm^{-1}$ , while the infrared intensities are in  $km/mol$  (bold text following the vibrational wavenumber)

## Dimer Structures: Br<sup>-</sup>-H<sub>2</sub>S

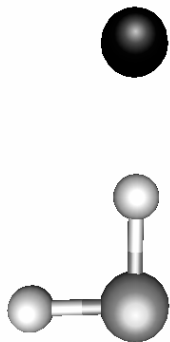

C<sub>s</sub> symmetry minimum

| Vibrational Frequencies |                  |                  |
|-------------------------|------------------|------------------|
|                         | MP2/aug-cc-pvdz  | MP2/aug-cc-pvtz  |
| $\omega_1 a'$           | 2764 <b>3</b>    | 2779 <b>2</b>    |
| $\omega_2 a'$           | 2246 <b>1923</b> | 2157 <b>2312</b> |
| $\omega_3 a'$           | 1180 <b>5</b>    | 1194 <b>7</b>    |
| $\omega_4 a'$           | 277 <b>6</b>     | 294 <b>5</b>     |
| $\omega_5 a'$           | 119 <b>28</b>    | 134 <b>33</b>    |
| $\omega_6 a''$          | 528 <b>1</b>     | 563 <b>&lt;1</b> |

|             | $r(\text{Br}\dots\text{H}_b)$ | $r(\text{S}-\text{H}_b)$ | $r(\text{S}-\text{H}_l)$ | $\theta(\text{Br}-\text{H}_b-\text{S})$ | $\theta(\text{H}-\text{S}-\text{H})$ | $zpe$ | $E_{\text{MP2}}$ | $E_{e/\text{BSSE}}$ | $\Delta E_{e/\text{BSSE}}$ | $\Delta E_{e/\text{BSSE}/\text{Corr}}$ | $\Delta H_0$ <sup>295K</sup> |
|-------------|-------------------------------|--------------------------|--------------------------|-----------------------------------------|--------------------------------------|-------|------------------|---------------------|----------------------------|----------------------------------------|------------------------------|
| <i>pvdz</i> | 2.288                         | 1.392                    | 1.349                    | 177.4                                   | 92.4                                 | 10.2  | -2971.481629     | -2971.478801        | 0.0                        | 0.0                                    | -10.3                        |
| <i>pvtz</i> | 2.207                         | 1.388                    | 1.336                    | 177.6                                   | 92.2                                 | 10.2  | -2971.704139     | -2971.701079        | 0.0                        | 0.0                                    | -11.1                        |

### VSCF and LEVEL 7.5 data for Br<sup>-</sup>-H<sub>2</sub>S at MP2/aug-cc-pvdz and -pvtz

|                           | $\omega_1 a'$ | $\omega_2 a'$    | $\omega_3 a'$ | $\omega_4 a'$ | $\omega_5 a'$ | $\omega_6 a''$   | $zpe$ |
|---------------------------|---------------|------------------|---------------|---------------|---------------|------------------|-------|
| <b><i>aug-cc-pvdz</i></b> |               |                  |               |               |               |                  |       |
| Harmonic                  | 2764 <b>4</b> | 2246 <b>1923</b> | 1180 <b>5</b> | 277 <b>6</b>  | 119 <b>28</b> | 528 <b>1</b>     | 10.2  |
| vscf                      | 2645          | 1923             | 1154          | 406           | 119           | 606              | 9.8   |
| cc-vscf                   | 2651 <b>7</b> | 1951 <b>1912</b> | 1153 <b>3</b> | 392 <b>8</b>  | 118 <b>26</b> | 597 <b>4</b>     | 9.8   |
| cc-vscf-qff               | 2652 <b>8</b> | 1921 <b>1970</b> | 1153 <b>3</b> | 417 <b>8</b>  | 117 <b>26</b> | 610 <b>4</b>     | 9.8   |
| <b><i>aug-cc-pvtz</i></b> |               |                  |               |               |               |                  |       |
| Harmonic                  | 2779 <b>2</b> | 2157 <b>2312</b> | 1194 <b>7</b> | 294 <b>5</b>  | 134 <b>33</b> | 563 <b>&lt;1</b> | 10.2  |
| Vscf                      | 2664          | 1859             | 1164          | 401           | 128           | 592              |       |
| cc-vscf                   | 2670 <b>6</b> | 1893 <b>2073</b> | 1163 <b>4</b> | 386 <b>7</b>  | 127 <b>29</b> | 593 <b>3</b>     |       |
| cc-vscf-qff               | 2672 <b>6</b> | 1854 <b>2149</b> | 1162 <b>4</b> | 419 <b>7</b>  | 125 <b>28</b> | 613 <b>3</b>     |       |
| Level 7.5                 |               | 1847             |               |               |               |                  |       |

### Data for H<sub>2</sub>S and Br<sup>-</sup> at MP2/aug-cc-pvdz and -pvtz

|                                        | H <sub>2</sub> S   |                    | Br <sup>-</sup>    |                    |
|----------------------------------------|--------------------|--------------------|--------------------|--------------------|
|                                        | <i>aug-cc-pvdz</i> | <i>aug-cc-pvtz</i> | <i>aug-cc-pvdz</i> | <i>aug-cc-pvtz</i> |
| $r(\text{S}-\text{H})^a$               | 1.350 (14)         | 1.336 (0)          |                    |                    |
| $\theta(\text{H}-\text{S}-\text{H})^a$ | 92.5 (4)           | 92.2 (1)           |                    |                    |
| $\omega_1 (a_1)$                       | 2755 <b>&lt;1</b>  | 2773 <b>&lt;1</b>  |                    |                    |
| $\omega_2 (a_1)$                       | 1193 <b>1</b>      | 1211 <b>1</b>      |                    |                    |
| $\omega_3 (b_2)$                       | 2780 <b>&lt;1</b>  | 2793 <b>1</b>      |                    |                    |
| $zpe$                                  | 9.6                | 9.7                |                    |                    |
| $E_{\text{MP2}}$                       | -398.853219        | -398.9088179       | -2572.609288       | -2572.774831       |

<sup>a</sup> Numbers in parentheses are differences between calculated and experimental values taken from; T. H. Edwards, N. K. Moncur and L. E. Snyder, *J. Chem. Phys.*, 1967, **46**, 2139

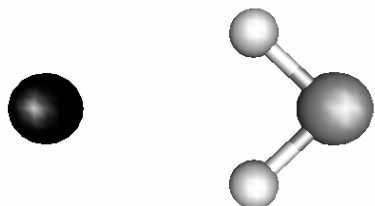

| Vibrational Frequencies |                        |                        |
|-------------------------|------------------------|------------------------|
|                         | <i>MP2/aug-cc-pvdz</i> | <i>MP2/aug-cc-pvtz</i> |
| $\omega_1 a_1$          | 2718 <b>96</b>         | 2725 <b>126</b>        |
| $\omega_2 a_1$          | 1111 <b>74</b>         | 1119 <b>78</b>         |
| $\omega_3 a_1$          | 99 <b>9</b>            | 104 <b>10</b>          |
| $\omega_4 b_1$          | 385 <b>8</b>           | 399 <b>5</b>           |
| $\omega_5 b_2$          | 2711 <b>1</b>          | 2711 <b>2</b>          |
| $\omega_6 b_2$          | 259 <i>i</i> <b>14</b> | 285 <i>i</i> <b>12</b> |

$C_{2v}$  symmetry, 1 imaginary frequency ( $b_2$ )

|             | $r(\text{Br}\cdots\text{H}_b)$ | $r(\text{S}-\text{H}_b)$ | $\theta(\text{Br}-\text{H}_b-\text{S})$ | $\theta(\text{H}-\text{S}-\text{H})$ | <i>zpe</i> | $E_{\text{MP2}}$ | $E_{e/\text{BSSE}}$ | $\Delta E_{e/\text{BSSE}}$ | $\Delta E_{e/\text{BSSE}/\text{Corr}}$ |
|-------------|--------------------------------|--------------------------|-----------------------------------------|--------------------------------------|------------|------------------|---------------------|----------------------------|----------------------------------------|
| <i>pvdz</i> | 2.917                          | 1.355                    | 117.5                                   | 87.5                                 | 10.0       | -2971.477268     | -2971.475395        | 2.1                        | 1.9                                    |
| <i>pvtz</i> | 2.829                          | 1.343                    | 117.5                                   | 87.0                                 | 10.1       | -2971.699093     | -2971.697303        | 2.4                        | 2.3                                    |

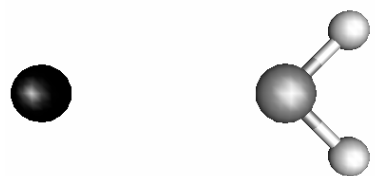

| Vibrational Frequencies |                        |                        |
|-------------------------|------------------------|------------------------|
|                         | <i>MP2/aug-cc-pvdz</i> | <i>MP2/aug-cc-pvtz</i> |
| $\omega_1 a_1$          | 2717 <b>37</b>         | 2736 <b>33</b>         |
| $\omega_2 a_1$          | 1190 <b>6</b>          | 1209 <b>7</b>          |
| $\omega_3 a_1$          | 40 <b>6</b>            | 44 <b>7</b>            |
| $\omega_4 b_1$          | 196 <b>31</b>          | 200 <b>29</b>          |
| $\omega_5 b_2$          | 2744 <b>8</b>          | 2757 <b>5</b>          |
| $\omega_6 b_2$          | 172 <i>i</i> <b>7</b>  | 175 <i>i</i> <b>6</b>  |

$C_{2v}$  symmetry, 1 imaginary frequency ( $b_2$ )

|             | $r(\text{Br}\cdots\text{S})$ | $r(\text{S}-\text{H}_t)$ | $\theta(\text{Br}-\text{S}-\text{H}_t)$ | $\theta(\text{H}-\text{S}-\text{H})$ | <i>zpe</i> | $E_{\text{MP2}}$ | $E_{e/\text{BSSE}}$ | $\Delta E_{e/\text{BSSE}}$ | $\Delta E_{e/\text{BSSE}/\text{Corr}}$ |
|-------------|------------------------------|--------------------------|-----------------------------------------|--------------------------------------|------------|------------------|---------------------|----------------------------|----------------------------------------|
| <i>pvdz</i> | 3.916                        | 1.354                    | 134.8                                   | 90.4                                 | 9.9        | -2971.461387     | -2971.460710        | 11.3                       | 11.0                                   |
| <i>pvtz</i> | 3.828                        | 1.341                    | 135.0                                   | 90.1                                 | 9.9        | -2971.683319     | -2971.682604        | 11.6                       | 11.3                                   |

## Trimer Structures: Br<sup>-</sup>-(H<sub>2</sub>S)<sub>2</sub>

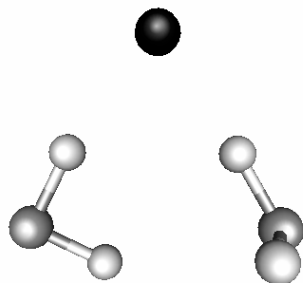

*C*<sub>1</sub> symmetry, minimum

|             | <i>r</i> (Br...H <sub>b</sub> ) | <i>r</i> (S-H <sub>b</sub> ) | <i>r</i> (S-H <sub>t</sub> ) | ∠(Br-H <sub>b</sub> -S) | ∠(H-S-H) | ∠(H <sub>b</sub> -Br-H <sub>b</sub> ) | <i>zpe</i> | <i>E</i> <sub>MP2</sub> | <i>E</i> <sub>e/BSSE</sub> | Δ <i>E</i> <sub>e/BSSE</sub> | Δ <i>E</i> <sub>e/BSSE/Corr</sub> | Δ <i>H</i> <sub>1</sub> <sup>295K</sup> |
|-------------|---------------------------------|------------------------------|------------------------------|-------------------------|----------|---------------------------------------|------------|-------------------------|----------------------------|------------------------------|-----------------------------------|-----------------------------------------|
| <i>pvdz</i> | 2.406 <i>D</i>                  | 1.376                        | 1.352                        | 169.1                   | 91.1     | 71.1                                  | 21.0       | -3370.353626            | -3370.347560               | 0.0                          | 0.0                               | -8.7                                    |
|             | 2.323 <i>A</i>                  | 1.386                        | 1.350                        | 175.4                   | 92.2     |                                       |            |                         |                            |                              |                                   |                                         |
| <i>pvtz</i> | 2.313 <i>D</i>                  | 1.371                        | 1.338                        | 171.3                   | 91.1     | 71.4                                  | 21.1       | -3370.632446            | -3370.626615               | 0.0                          | 0.0                               | -9.4                                    |
|             | 2.260 <i>A</i>                  | 1.378                        | 1.337                        | 175.1                   | 91.9     |                                       |            |                         |                            |                              |                                   |                                         |

*D*=H-bond donor, *A*=H-bond acceptor

HSH...SH<sub>2</sub> Hbond angle = 138.3° (apvdz)

132.4° (apvtz)

| Vibrational Frequencies  |                        |                        |
|--------------------------|------------------------|------------------------|
|                          | <i>MP2/aug-cc-pvdz</i> | <i>MP2/aug-cc-pvtz</i> |
| ω <sub>1</sub> <i>a</i>  | 2761 <b>2</b>          | 2776 <b>1</b>          |
| ω <sub>2</sub> <i>a</i>  | 2739 <b>12</b>         | 2759 <b>8</b>          |
| ω <sub>3</sub> <i>a</i>  | 2442 <b>1046</b>       | 2376 <b>1429</b>       |
| ω <sub>4</sub> <i>a</i>  | 2311 <b>1150</b>       | 2262 <b>1185</b>       |
| ω <sub>5</sub> <i>a</i>  | 1183 <b>13</b>         | 1200 <b>12</b>         |
| ω <sub>6</sub> <i>a</i>  | 1180 <b>5</b>          | 1194 <b>6</b>          |
| ω <sub>7</sub> <i>a</i>  | 520 <b>5</b>           | 543 <b>4</b>           |
| ω <sub>8</sub> <i>a</i>  | 461 <b>2</b>           | 497 <b>1</b>           |
| ω <sub>9</sub> <i>a</i>  | 269 <b>4</b>           | 286 <b>4</b>           |
| ω <sub>10</sub> <i>a</i> | 257 <b>5</b>           | 271 <b>4</b>           |
| ω <sub>11</sub> <i>a</i> | 241 <b>1</b>           | 234 <b>1</b>           |
| ω <sub>12</sub> <i>a</i> | 125 <b>24</b>          | 136 <b>26</b>          |
| ω <sub>13</sub> <i>a</i> | 105 <b>15</b>          | 114 <b>16</b>          |
| ω <sub>14</sub> <i>a</i> | 61 <b>2</b>            | 58 <b>1</b>            |
| ω <sub>15</sub> <i>a</i> | 53 <b>11</b>           | 36 <b>14</b>           |

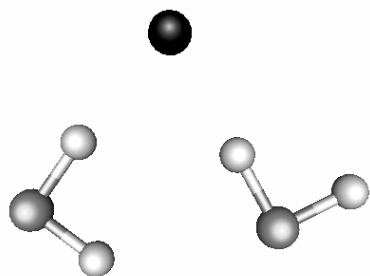

$C_s$  symmetry, one imaginary frequency ( $a''$ )

| Vibrational Frequencies |                        |                        |
|-------------------------|------------------------|------------------------|
|                         | MP2/aug-cc-pvdz        | MP2/aug-cc-pvtz        |
| $\omega_1 a'$           | 2766 <b>3</b>          | 2778 <b>2</b>          |
| $\omega_2 a'$           | 2757 < <b>1</b>        | 2771 < <b>1</b>        |
| $\omega_3 a'$           | 2409 <b>1292</b>       | 2360 <b>1534</b>       |
| $\omega_4 a'$           | 2322 <b>1075</b>       | 2256 <b>1251</b>       |
| $\omega_5 a'$           | 1197 <b>4</b>          | 1215 <b>5</b>          |
| $\omega_6 a'$           | 1181 <b>1</b>          | 1198 <b>1</b>          |
| $\omega_7 a'$           | 277 <b>11</b>          | 298 <b>4</b>           |
| $\omega_8 a'$           | 273 <b>7</b>           | 289 <b>12</b>          |
| $\omega_9 a'$           | 124 <b>23</b>          | 135 <b>26</b>          |
| $\omega_{10} a'$        | 103 <b>12</b>          | 112 <b>13</b>          |
| $\omega_{11} a'$        | 43 <b>1</b>            | 42 < <b>1</b>          |
| $\omega_{12} a''$       | 492 <b>1</b>           | 523 < <b>1</b>         |
| $\omega_{13} a''$       | 460 < <b>1</b>         | 488 < <b>1</b>         |
| $\omega_{14} a''$       | 107 < <b>1</b>         | 107 < <b>1</b>         |
| $\omega_{15} a''$       | 141 <i>i</i> <b>21</b> | 142 <i>i</i> <b>19</b> |

|             | $r(\text{Br}\cdots\text{H}_b)$   | $r(\text{S}-\text{H}_b)$ | $r(\text{S}-\text{H}_i)$ | $\theta(\text{Br}-\text{H}_b-\text{S})$ | $\theta(\text{H}-\text{S}-\text{H})$ | $\theta(\text{H}_b-\text{Br}-\text{H}_b)$ | $zpe$ | $E_{MP2}$    | $E_e/BSSE$   | $\Delta E_e/BSSE$ | $\Delta E_e/BSSE/Corr$ |
|-------------|----------------------------------|--------------------------|--------------------------|-----------------------------------------|--------------------------------------|-------------------------------------------|-------|--------------|--------------|-------------------|------------------------|
| <i>pvdz</i> | 2.377 <i>D</i><br>2.328 <i>A</i> | 1.379<br>1.384           | 1.350<br>1.350           | 174.7<br>180.0                          | 92.4<br>92.6                         | 68.8                                      | 20.8  | -3370.352205 | -3370.346267 | 0.8               | 0.6                    |
| <i>pvtz</i> | 2.302 <i>D</i><br>2.255 <i>A</i> | 1.372<br>1.378           | 1.337<br>1.336           | 175.0<br>179.5                          | 92.3<br>92.4                         | 69.3                                      | 20.8  | -3370.631051 | -3370.625254 | 0.9               | 0.6                    |

*D*=H-bond donor, *A*=H-bond acceptor

HSH...SH<sub>2</sub> Hbond angle = 133.3° (apvdz)

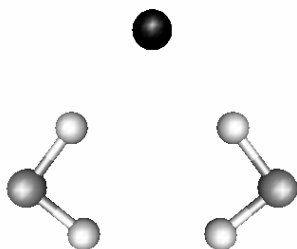

$C_{2v}$  symmetry, one imaginary frequency ( $a_2$ )

|             | $r(\text{Br}\dots\text{H}_b)$ | $r(\text{S}-\text{H}_b)$ | $r(\text{S}-\text{H}_t)$ | $\theta(\text{Br}-\text{H}_b-\text{S})$ | $\theta(\text{H}-\text{S}-\text{H})$ | $\theta(\text{H}_b-\text{Br}-\text{H}_b)$ | $zpe$ | $E_{\text{MP2}}$ | $E_{e/\text{BSSE}}$ | $\Delta E_{e/\text{BSSE}}$ | $\Delta E_{e/\text{BSSE}/\text{Corr}}$ |
|-------------|-------------------------------|--------------------------|--------------------------|-----------------------------------------|--------------------------------------|-------------------------------------------|-------|------------------|---------------------|----------------------------|----------------------------------------|
| <i>pvdz</i> | 2.345                         | 1.383                    | 1.349                    | 177.1                                   | 92.5                                 | 78.9                                      | 20.6  | -3370.352044     | -3370.346154        | 0.9                        | 0.5                                    |
| <i>pvtz</i> | 2.272                         | 1.376                    | 1.336                    | 177.2                                   | 82.3                                 | 80.3                                      | 20.7  | -3370.630878     | -3370.625030        | 1.0                        | 0.6                                    |

| Vibrational Frequencies |                        |                        |
|-------------------------|------------------------|------------------------|
|                         | <i>MP2/aug-cc-pvdz</i> | <i>MP2/aug-cc-pvtz</i> |
| $\omega_1 a_1$          | 2765 <b>1</b>          | 2780 <b>1</b>          |
| $\omega_2 a_1$          | 2380 <b>1471</b>       | 2329 <b>1681</b>       |
| $\omega_3 a_1$          | 1192 <b>5</b>          | 1210 <b>7</b>          |
| $\omega_4 a_1$          | 279 <b>16</b>          | 298 <b>13</b>          |
| $\omega_5 a_1$          | 122 <b>21</b>          | 133 <b>23</b>          |
| $\omega_6 a_1$          | 36 <b>&lt;1</b>        | 33 <b>&lt;1</b>        |
| $\omega_7 a_2$          | 482 <b>0</b>           | 509 <b>0</b>           |
| $\omega_8 a_2$          | 154 <b>i 0</b>         | 149 <b>i 0</b>         |
| $\omega_9 b_1$          | 493 <b>2</b>           | 521 <b>1</b>           |
| $\omega_{10} b_1$       | 61 <b>14</b>           | 60 <b>13</b>           |
| $\omega_{11} b_2$       | 2762 <b>6</b>          | 2778 <b>2</b>          |
| $\omega_{12} b_2$       | 2329 <b>1034</b>       | 2265 <b>1279</b>       |
| $\omega_{13} b_2$       | 1180 <b>1</b>          | 1196 <b>1</b>          |
| $\omega_{14} b_2$       | 251 <b>1</b>           | 260 <b>1</b>           |
| $\omega_{15} b_2$       | 106 <b>15</b>          | 116 <b>17</b>          |

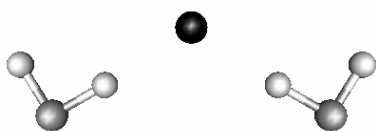

$C_{2v}$  symmetry, two imaginary frequencies ( $a_1$  and  $b_2$ )

|             | $r(\text{Br}\dots\text{H}_b)$ | $r(\text{S}-\text{H}_b)$ | $r(\text{S}-\text{H}_t)$ | $\theta(\text{Br}-\text{H}_b-\text{S})$ | $\theta(\text{H}-\text{S}-\text{H})$ | $\theta(\text{H}_b-\text{Br}-\text{H}_b)$ | $zpe$ | $E_{\text{MP2}}$ | $E_{e/\text{BSSE}}$ | $\Delta E_{e/\text{BSSE}}$ | $\Delta E_{e/\text{BSSE}/\text{Corr}}$ |
|-------------|-------------------------------|--------------------------|--------------------------|-----------------------------------------|--------------------------------------|-------------------------------------------|-------|------------------|---------------------|----------------------------|----------------------------------------|
| <i>pvdz</i> | 2.357                         | 1.381                    | 1.349                    | 176.1                                   | 92.3                                 | 112.8                                     | 20.5  | -3370.351325     | -3370.345916        | 1.0                        | 0.5                                    |
| <i>pvtz</i> | 2.282                         | 1.374                    | 1.336                    | 176.3                                   | 92.1                                 | 118.6                                     | 20.6  | -3370.630247     | -3370.624656        | 1.2                        | 0.7                                    |

| Vibrational Frequencies |                        |                        |
|-------------------------|------------------------|------------------------|
|                         | <i>MP2/aug-cc-pvdz</i> | <i>MP2/aug-cc-pvtz</i> |
| $\omega_1 a_1$          | 2765 <b>5</b>          | 2781 <b>2</b>          |
| $\omega_2 a_1$          | 2398 <b>541</b>        | 2348 <b>520</b>        |
| $\omega_3 a_1$          | 1187 <b>5</b>          | 1204 <b>6</b>          |
| $\omega_4 a_1$          | 255 <b>2</b>           | 272 <b>3</b>           |
| $\omega_5 a_1$          | 107 <b>7</b>           | 116 <b>6</b>           |
| $\omega_6 a_1$          | <b>6</b> <1            | 7 <1                   |
| $\omega_7 a_2$          | 485 <b>0</b>           | 515 <b>0</b>           |
| $\omega_8 a_2$          | 36 <b>i 0</b>          | 32 <b>i 0</b>          |
| $\omega_9 b_1$          | 481 <b>3</b>           | 508 <b>2</b>           |
| $\omega_{10} b_1$       | 19 <b>i 22</b>         | 16 <b>i 19</b>         |
| $\omega_{11} b_2$       | 2765 <b>&lt;1</b>      | 2781 <b>&lt;1</b>      |
| $\omega_{12} b_2$       | 2361 <b>2279</b>       | 2299 <b>2901</b>       |
| $\omega_{13} b_2$       | 1183 <b>6</b>          | 1199 <b>9</b>          |
| $\omega_{14} b_2$       | 250 <b>10</b>          | 263 <b>7</b>           |
| $\omega_{15} b_2$       | 116 <b>34</b>          | 128 <b>43</b>          |

## Tetramer Structures: $\text{Br}^--(\text{H}_2\text{S})_3$

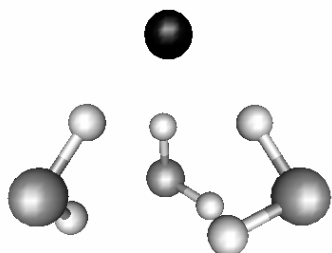

$C_3$  symmetry, minimum

|             | $r(\text{Br}-\text{H}_b)$ | $r(\text{S}-\text{H}_b)$ | $r(\text{S}-\text{H}_t)$ | $\theta(\text{Br}-\text{H}_b-\text{S})$ | $\theta(\text{H}-\text{S}-\text{H})$ | $\theta(\text{H}_b-\text{Br}-\text{H}_b)$ | $zpe$ | $E_{MP2}$    | $E_e/BSSE$   | $\Delta E_e/BSSE$ | $\Delta E_e/BSSE/Corr$ | $\Delta H_2 \rightarrow 3^{295K}$ |
|-------------|---------------------------|--------------------------|--------------------------|-----------------------------------------|--------------------------------------|-------------------------------------------|-------|--------------|--------------|-------------------|------------------------|-----------------------------------|
| <i>pvdz</i> | 2.425                     | 1.375                    | 1.354                    | 167.1                                   | 90.9                                 | 71.2                                      | 32.3  | -3769.226633 | -3769.216586 | 0.0               | 0.0                    | -8.6                              |

HSH...SH<sub>2</sub> Hbond angle = 142.1° (apvdz)

| Vibrational Frequencies |                        |
|-------------------------|------------------------|
|                         | <i>MP2/aug-cc-pvdz</i> |
| $\omega_1 a$            | 2719 <b>1</b>          |
| $\omega_2 a$            | 2494 <b>1132</b>       |
| $\omega_3 a$            | 1182 <b>16</b>         |
| $\omega_4 a$            | 469 < <b>1</b>         |
| $\omega_5 a$            | 348 < <b>1</b>         |
| $\omega_6 a$            | 273 <b>4</b>           |
| $\omega_7 a$            | 129 <b>18</b>          |
| $\omega_8 a$            | 73 <b>2</b>            |
| $\omega_9 e$            | 2725 <b>34 (68)</b>    |
| $\omega_{10} e$         | 2443 <b>392 (784)</b>  |
| $\omega_{11} e$         | 1181 <b>9 (18)</b>     |
| $\omega_{12} e$         | 473 <b>10 (20)</b>     |
| $\omega_{13} e$         | 257 <b>2 (4)</b>       |
| $\omega_{14} e$         | 221 <b>9 (18)</b>      |
| $\omega_{15} e$         | 103 <b>7 (14)</b>      |
| $\omega_{16} e$         | 59 <b>1 (2)</b>        |

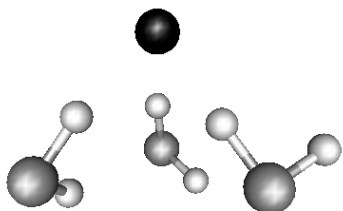

$C_1$  symmetry, minimum

|             | $r(\text{Br}\cdots\text{H}_b)$ | $r(\text{S}-\text{H}_b)$ | $r(\text{S}-\text{H}_l)$ | $\theta(\text{Br}-\text{H}_b-\text{S})$ | $\theta(\text{H}-\text{S}-\text{H})$ | $\theta(\text{H}_b-\text{Br}-\text{H}_b)$ | $zpe$ | $E_{MP2}$    | $E_{e/BSSE}$ | $\Delta E_{e/BSSE}$ | $\Delta E_{e/BSSE/Corr}$ |
|-------------|--------------------------------|--------------------------|--------------------------|-----------------------------------------|--------------------------------------|-------------------------------------------|-------|--------------|--------------|---------------------|--------------------------|
| <i>pvdz</i> | 2.436 <i>l</i>                 | 1.372                    | 1.353                    | 166.7                                   | 91.0                                 | 71.7 <i>l-m</i>                           | 32.1  | -3769.224624 | -3769.215008 | 1.0                 | 0.8                      |
|             | 2.438 <i>m</i>                 | 1.374                    | 1.353                    | 166.8                                   | 90.9                                 | 70.2 <i>m-r</i>                           |       |              |              |                     |                          |
|             | 2.383 <i>r</i>                 | 1.378                    | 1.351                    | 173.7                                   | 92.0                                 | 66.9 <i>r-l</i>                           |       |              |              |                     |                          |

*l*=left, *m*=middle, *r*=right

HSH...SH<sub>2</sub> Hbond angles = 142.8° *l-m*  
143.0° *m-r*

| Vibrational Frequencies |                        |
|-------------------------|------------------------|
|                         | <i>MP2/aug-cc-pvdz</i> |
| $\omega_1 a$            | 2755 <b>3</b>          |
| $\omega_2 a$            | 2731 <b>22</b>         |
| $\omega_3 a$            | 2722 <b>23</b>         |
| $\omega_4 a$            | 2510 <b>929</b>        |
| $\omega_5 a$            | 2466 <b>451</b>        |
| $\omega_6 a$            | 2412 <b>635</b>        |
| $\omega_7 a$            | 1186 <b>5</b>          |
| $\omega_8 a$            | 1183 <b>10</b>         |
| $\omega_9 a$            | 1181 <b>9</b>          |
| $\omega_{10} a$         | 490 <b>6</b>           |
| $\omega_{11} a$         | 464 <b>7</b>           |
| $\omega_{12} a$         | 430 <b>5</b>           |
| $\omega_{13} a$         | 311 <b>7</b>           |
| $\omega_{14} a$         | 267 <b>4</b>           |
| $\omega_{15} a$         | 254 <b>5</b>           |
| $\omega_{16} a$         | 248 <b>3</b>           |
| $\omega_{17} a$         | 200 <b>6</b>           |
| $\omega_{18} a$         | 149 <b>11</b>          |
| $\omega_{19} a$         | 128 <b>18</b>          |
| $\omega_{20} a$         | 103 <b>6</b>           |
| $\omega_{21} a$         | 101 <b>7</b>           |
| $\omega_{22} a$         | 68 <b>2</b>            |
| $\omega_{23} a$         | 57 <b>0</b>            |
| $\omega_{24} a$         | 28 <b>0</b>            |



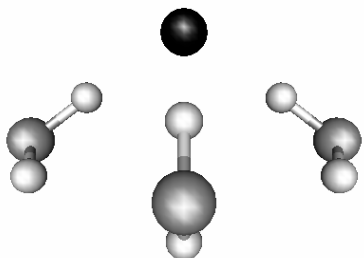

$C_s$  symmetry, minimum

|             | $r(\text{Br}\cdots\text{H}_b)$ | $r(\text{S}-\text{H}_b)$ | $r(\text{S}-\text{H}_t)$ | $\theta(\text{Br}-\text{H}_b-\text{S})$ | $\theta(\text{H}-\text{S}-\text{H})$ | $\theta(\text{H}_b-\text{Br}-\text{H}_b)$ | $zpe$ | $E_{MP2}$    | $E_{e/BSSE}$ | $\Delta E_{e/BSSE}$ | $\Delta E_{e/BSSE/Corr}$ |
|-------------|--------------------------------|--------------------------|--------------------------|-----------------------------------------|--------------------------------------|-------------------------------------------|-------|--------------|--------------|---------------------|--------------------------|
| <i>pvdz</i> | 2.438 <i>D</i>                 | 1.372                    | 1.352                    | 169.0                                   | 91.3                                 | 113.5 <i>D-D</i>                          | 31.8  | -3769.223913 | -3769.214714 | 1.2                 | 0.7                      |
|             | 2.353 <i>A</i>                 | 1.382                    | 1.351                    | 174.0                                   | 92.0                                 | 70.1 <i>A-D</i>                           |       |              |              |                     |                          |

*D*=H-bond donors, *A*=H-bond acceptor

HSH...SH<sub>2</sub> Hbond angle = 136.5°

| Vibrational Frequencies |                        |
|-------------------------|------------------------|
|                         | <i>MP2/aug-cc-pvdz</i> |
| $\omega_1 a'$           | 2754 <b>1</b>          |
| $\omega_2 a'$           | 2744 <b>6</b>          |
| $\omega_3 a'$           | 2506 <b>541</b>        |
| $\omega_4 a'$           | 2363 <b>740</b>        |
| $\omega_5 a'$           | 1186 <b>7</b>          |
| $\omega_6 a'$           | 1177 <b>2</b>          |
| $\omega_7 a'$           | 437 <b>2</b>           |
| $\omega_8 a'$           | 260 <b>8</b>           |
| $\omega_9 a'$           | 238 <b>4</b>           |
| $\omega_{10} a'$        | 203 <b>5</b>           |
| $\omega_{11} a'$        | 123 <b>17</b>          |
| $\omega_{12} a'$        | 94 <b>2</b>            |
| $\omega_{13} a'$        | 53 <b>1</b>            |
| $\omega_{14} a'$        | 8 < <b>1</b>           |
| $\omega_{15} a''$       | 2743 <b>9</b>          |
| $\omega_{16} a''$       | 2476 <b>1079</b>       |
| $\omega_{17} a''$       | 1185 <b>16</b>         |
| $\omega_{18} a''$       | 513 <b>6</b>           |
| $\omega_{19} a''$       | 430 <b>2</b>           |
| $\omega_{20} a''$       | 265 < <b>1</b>         |
| $\omega_{21} a''$       | 247 < <b>1</b>         |
| $\omega_{22} a''$       | 114 <b>26</b>          |
| $\omega_{23} a''$       | 65 < <b>1</b>          |
| $\omega_{24} a''$       | 42 <b>17</b>           |

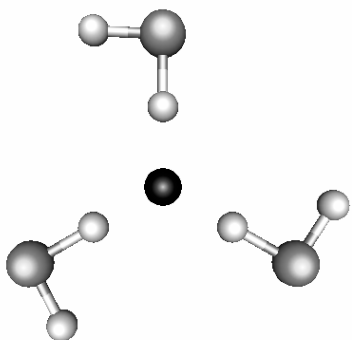

$C_{3h}$  symmetry, six imaginary frequencies ( $2a'' + 2e' + 2e''$ )

|             | $r(\text{Br}-\text{H}_b)$ | $r(\text{S}-\text{H}_b)$ | $r(\text{S}-\text{H}_t)$ | $\theta(\text{Br}-\text{H}_b-\text{S})$ | $\theta(\text{H}-\text{S}-\text{H})$ | $\theta(\text{H}_b-\text{Br}-\text{H}_b)$ | $zpe$ | $E_{MP2}$    | $E_{e/BSSE}$ | $\Delta E_{e/BSSE}$ | $\Delta E_{e/BSSE/Corr}$ |
|-------------|---------------------------|--------------------------|--------------------------|-----------------------------------------|--------------------------------------|-------------------------------------------|-------|--------------|--------------|---------------------|--------------------------|
| <i>pvdz</i> | 2.402                     | 1.375                    | 1.349                    | 176.6                                   | 92.3                                 | 120.0                                     | 30.9  | -3769.219449 | -3769.211571 | 3.2                 | 1.8                      |

| Vibrational Frequencies |                        |
|-------------------------|------------------------|
|                         | <i>MP2/aug-cc-pvdz</i> |
| $\omega_1 a'$           | 2766 <b>0</b>          |
| $\omega_2 a'$           | 2486 <b>0</b>          |
| $\omega_3 a'$           | 1185 <b>0</b>          |
| $\omega_4 a'$           | 231 <b>0</b>           |
| $\omega_5 a'$           | 94 <b>0</b>            |
| $\omega_6 a''$          | 438 <b>7</b>           |
| $\omega_7 a''$          | 8i <b>&lt;1</b>        |
| $\omega_8 a''$          | 49i <b>31</b>          |
| $\omega_9 e'$           | 2766 <b>3</b>          |
| $\omega_{10} e'$        | 2443 <b>1655</b>       |
| $\omega_{11} e'$        | 1188 <b>8</b>          |
| $\omega_{12} e'$        | 231 <b>10</b>          |
| $\omega_{13} e'$        | 112 <b>21</b>          |
| $\omega_{14} e'$        | 5i <b>&lt;1</b>        |
| $\omega_{15} e''$       | 448 <b>0</b>           |
| $\omega_{16} e''$       | 25i <b>0</b>           |

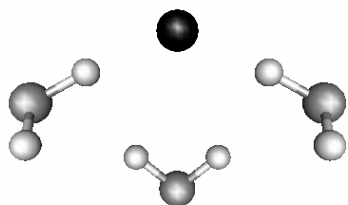

$C_s$  symmetry, one imaginary frequency ( $a''$ )

H<sub>2</sub>Ss bound to anion

|             | $r(\text{Br}\cdots\text{H}_b)$ | $r(\text{S}-\text{H}_b)$ | $r(\text{S}-\text{H}_l)$ | $\theta(\text{Br}-\text{H}_b-\text{S})$ | $\theta(\text{H}-\text{S}-\text{H})$ | $\theta(\text{H}_l-\text{Br}-\text{H}_b)$ | $zpe$ | $E_{\text{MP2}}$ | $E_e/\text{BSSE}$ | $\Delta E_e/\text{BSSE}$ | $\Delta E_e/\text{BSSE}/\text{Corr}$ |
|-------------|--------------------------------|--------------------------|--------------------------|-----------------------------------------|--------------------------------------|-------------------------------------------|-------|------------------|-------------------|--------------------------|--------------------------------------|
| <i>pvdz</i> | 2.319                          | 1.383                    | 1.350                    | 174.6                                   | 92.3                                 | 128.3                                     | 31.3  | -3769.220052     | -3769.211406      | 3.3                      | 2.3                                  |

Satellite H<sub>2</sub>S

|             | $r(\text{S}\cdots\text{H}_b)$ | $r(\text{S}-\text{H}_b)$ | $\theta(\text{S}-\text{H}_b-\text{S})$ | $\theta(\text{H}-\text{S}-\text{H})$ |
|-------------|-------------------------------|--------------------------|----------------------------------------|--------------------------------------|
| <i>pvdz</i> | 2.809                         | 1.353                    | 164.7                                  | 92.1                                 |

HSH...SH<sub>2</sub> Hbond angles = 164.7°

| Vibrational Frequencies |                        |
|-------------------------|------------------------|
|                         | <i>MP2/aug-cc-pvdz</i> |
| $\omega_1 a'$           | 2760 <b>1</b>          |
| $\omega_2 a'$           | 2716 <b>60</b>         |
| $\omega_3 a'$           | 2380 <b>478</b>        |
| $\omega_4 a'$           | 1181 <b>9</b>          |
| $\omega_5 a'$           | 1158 <b>1</b>          |
| $\omega_6 a'$           | 501 <b>3</b>           |
| $\omega_7 a'$           | 328 <b>4</b>           |
| $\omega_8 a'$           | 249 <b>12</b>          |
| $\omega_9 a'$           | 114 <b>4</b>           |
| $\omega_{10} a'$        | 110 <b>29</b>          |
| $\omega_{11} a'$        | 72 <b>1</b>            |
| $\omega_{12} a'$        | 28 < <b>1</b>          |
| $\omega_{13} a'$        | 8 < <b>1</b>           |
| $\omega_{14} a''$       | 2760 <b>1</b>          |
| $\omega_{15} a''$       | 2732 <b>95</b>         |
| $\omega_{16} a''$       | 2329 <b>2172</b>       |
| $\omega_{17} a''$       | 1183 < <b>1</b>        |
| $\omega_{18} a''$       | 499 <b>19</b>          |
| $\omega_{19} a''$       | 293 < <b>1</b>         |
| $\omega_{20} a''$       | 251 <b>2</b>           |
| $\omega_{21} a''$       | 125 <b>37</b>          |
| $\omega_{22} a''$       | 83 < <b>1</b>          |
| $\omega_{23} a''$       | 59 < <b>1</b>          |
| $\omega_{24} a''$       | 154i <b>22</b>         |

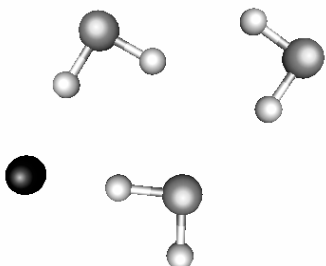

$C_s$  symmetry, two imaginary frequencies ( $2a''$ )

|             | $r(\text{Br}\cdots\text{H}_b)$   | $r(\text{S}-\text{H}_b)$ | $r(\text{S}-\text{H}_l)$ | $\theta(\text{Br}-\text{H}_b-\text{S})$ | $\theta(\text{H}-\text{S}-\text{H})$ | $\theta(\text{H}_b-\text{Br}-\text{H}_b)$ | $zpe$ | $E_{MP2}$    | $E_e/BSSE$   | $\Delta E_e/BSSE$ | $\Delta E_e/BSSE/Corr$ |
|-------------|----------------------------------|--------------------------|--------------------------|-----------------------------------------|--------------------------------------|-------------------------------------------|-------|--------------|--------------|-------------------|------------------------|
| <i>pvdz</i> | 2.362 <i>l</i><br>2.270 <i>b</i> | 1.380<br>1.391           | 1.350<br>1.348           | 172.2<br>178.8                          | 91.7<br>93.6                         | 69.5                                      | 30.9  | -3769.213204 | -3769.205165 | 7.2               | 5.8                    |

Satellite  $\text{H}_2\text{S}$

|             | $r(\text{S}\cdots\text{H}_b)$    | $r(\text{S}-\text{H}_b)$ | $\theta(\text{H}-\text{S}-\text{H})$ |
|-------------|----------------------------------|--------------------------|--------------------------------------|
| <i>pvdz</i> | 3.342 <i>l</i><br>2.692 <i>b</i> | 1.350<br>1.354           | 92.3                                 |

*l*=left, *b*=bottom

HSH...SH<sub>2</sub> Hbond angles = 135.8° *l-b*  
 168.4° *sat-b*  
 76.4° *sat-l*

| Vibrational Frequencies |                        |
|-------------------------|------------------------|
|                         | <i>MP2/aug-cc-pvdz</i> |
| $\omega_1 a'$           | 2769 <b>3</b>          |
| $\omega_2 a'$           | 2763 <b>4</b>          |
| $\omega_3 a'$           | 2762 <b>1</b>          |
| $\omega_4 a'$           | 2718 <b>80</b>         |
| $\omega_5 a'$           | 2390 <b>1332</b>       |
| $\omega_6 a'$           | 2234 <b>1449</b>       |
| $\omega_7 a'$           | 1203 <b>7</b>          |
| $\omega_8 a'$           | 1189 <b>12</b>         |
| $\omega_9 a'$           | 1174 <b>2</b>          |
| $\omega_{10} a'$        | 291 <b>12</b>          |
| $\omega_{11} a'$        | 288 <b>7</b>           |
| $\omega_{12} a'$        | 167 <b>6</b>           |
| $\omega_{13} a'$        | 136 <b>23</b>          |
| $\omega_{14} a'$        | 110 <b>16</b>          |
| $\omega_{15} a'$        | 75 <b>5</b>            |
| $\omega_{16} a'$        | 46 <b>2</b>            |
| $\omega_{17} a'$        | 35 < <b>1</b>          |
| $\omega_{18} a''$       | 498 <b>1</b>           |
| $\omega_{19} a''$       | 454 <b>1</b>           |
| $\omega_{20} a''$       | 220 <b>2</b>           |
| $\omega_{21} a''$       | 89 <b>3</b>            |
| $\omega_{22} a''$       | 15 <b>1</b>            |
| $\omega_{23} a''$       | 165i <b>19</b>         |
| $\omega_{24} a''$       | 202i <b>10</b>         |

# Pentamer Structures: Br<sup>-</sup>-(H<sub>2</sub>S)<sub>4</sub>

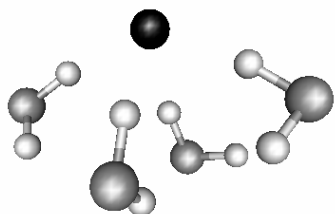

*C*<sub>1</sub> symmetry, minimum

|             | <i>r</i> (Br-H <sub>l</sub> ) | <i>r</i> (S-H <sub>b</sub> ) | <i>r</i> (S-H <sub>l</sub> ) | <i>θ</i> (Br-H <sub>b</sub> -S) | <i>θ</i> (H-S-H) | <i>θ</i> (H <sub>b</sub> -Br-H <sub>b</sub> ) | <i>zpe</i> | <i>E</i> <sub>MP2</sub> | <i>E</i> <sub><i>e</i>/BSSE</sub> | <i>ΔE</i> <sub><i>e</i>/BSSE</sub> | <i>ΔE</i> <sub><i>e</i>/BSSE/Corr</sub> | <i>ΔH</i> <sub>3</sub> <sup>295K</sup> |
|-------------|-------------------------------|------------------------------|------------------------------|---------------------------------|------------------|-----------------------------------------------|------------|-------------------------|-----------------------------------|------------------------------------|-----------------------------------------|----------------------------------------|
| <i>pvdz</i> | 2.465 <i>l</i>                | 1.368                        | 1.352                        | 167.6                           | 91.2             | 70.4 <i>l-f</i>                               | 43.2       | -4168.096178            | -4168.082711                      | 0.0                                | 0.0                                     | -6.8                                   |
|             | 2.453 <i>f</i>                | 1.373                        | 1.356                        | 165.3                           | 90.8             | 70.5 <i>f-b</i>                               |            |                         |                                   |                                    |                                         | Checked                                |
|             | 2.483 <i>b</i>                | 1.369                        | 1.354                        | 164.9                           | 90.9             | 71.2 <i>b-r</i>                               |            |                         |                                   |                                    |                                         |                                        |
|             | 2.451 <i>r</i>                | 1.371                        | 1.353                        | 167.5                           | 91.0             | 129.1 <i>r-l</i>                              |            |                         |                                   |                                    |                                         |                                        |

*l*=left, *f*=front, *b*=back, *r*=right

HSH...SH<sub>2</sub> Hbond angles = 142.1° *l-f*  
 146.6° *f-b*  
 141.9° *b-r*  
 141.7° *r-f*

| Vibrational Frequencies         |                        |
|---------------------------------|------------------------|
|                                 | <i>MP2/aug-cc-pvdz</i> |
| <i>ω</i> <sub>1</sub> <i>a</i>  | 2736 <b>14</b>         |
| <i>ω</i> <sub>2</sub> <i>a</i>  | 2728 <b>23</b>         |
| <i>ω</i> <sub>3</sub> <i>a</i>  | 2721 <b>19</b>         |
| <i>ω</i> <sub>4</sub> <i>a</i>  | 2700 <b>39</b>         |
| <i>ω</i> <sub>5</sub> <i>a</i>  | 2556 <b>605</b>        |
| <i>ω</i> <sub>6</sub> <i>a</i>  | 2520 <b>475</b>        |
| <i>ω</i> <sub>7</sub> <i>a</i>  | 2498 <b>573</b>        |
| <i>ω</i> <sub>8</sub> <i>a</i>  | 2477 <b>270</b>        |
| <i>ω</i> <sub>9</sub> <i>a</i>  | 1186 <b>13</b>         |
| <i>ω</i> <sub>10</sub> <i>a</i> | 1184 <b>6</b>          |
| <i>ω</i> <sub>11</sub> <i>a</i> | 1184 <b>13</b>         |
| <i>ω</i> <sub>12</sub> <i>a</i> | 1180 <b>3</b>          |
| <i>ω</i> <sub>13</sub> <i>a</i> | 481 <b>10</b>          |
| <i>ω</i> <sub>14</sub> <i>a</i> | 452 <b>3</b>           |
| <i>ω</i> <sub>15</sub> <i>a</i> | 448 <b>8</b>           |
| <i>ω</i> <sub>16</sub> <i>a</i> | 408 <b>6</b>           |
| <i>ω</i> <sub>17</sub> <i>a</i> | 374 <b>3</b>           |
| <i>ω</i> <sub>18</sub> <i>a</i> | 270 <b>5</b>           |
| <i>ω</i> <sub>19</sub> <i>a</i> | 267 <b>2</b>           |
| <i>ω</i> <sub>20</sub> <i>a</i> | 250 <b>5</b>           |
| <i>ω</i> <sub>21</sub> <i>a</i> | 244 <b>5</b>           |
| <i>ω</i> <sub>22</sub> <i>a</i> | 233 <b>3</b>           |
| <i>ω</i> <sub>23</sub> <i>a</i> | 226 <b>12</b>          |
| <i>ω</i> <sub>24</sub> <i>a</i> | 189 <b>7</b>           |
| <i>ω</i> <sub>25</sub> <i>a</i> | 127 <b>13</b>          |
| <i>ω</i> <sub>26</sub> <i>a</i> | 114 <b>15</b>          |
| <i>ω</i> <sub>27</sub> <i>a</i> | 99 <b>5</b>            |
| <i>ω</i> <sub>28</sub> <i>a</i> | 92 < <b>1</b>          |
| <i>ω</i> <sub>29</sub> <i>a</i> | 74 <b>2</b>            |
| <i>ω</i> <sub>30</sub> <i>a</i> | 68 < <b>1</b>          |
| <i>ω</i> <sub>31</sub> <i>a</i> | 61 < <b>1</b>          |
| <i>ω</i> <sub>32</sub> <i>a</i> | 48 < <b>1</b>          |
| <i>ω</i> <sub>33</sub> <i>a</i> | 22 < <b>1</b>          |

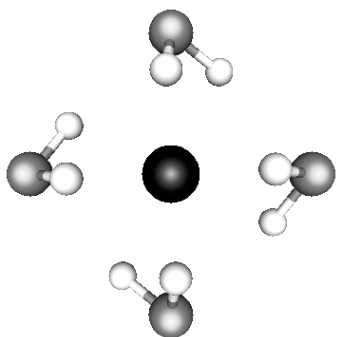

$C_4$  symmetry, minimum

|             | $r(\text{Br}-\text{H}_b)$ | $r(\text{S}-\text{H}_b)$ | $r(\text{S}-\text{H}_t)$ | $\theta(\text{Br}-\text{H}_b-\text{S})$ | $\theta(\text{H}-\text{S}-\text{H})$ | $\theta(\text{H}_b-\text{Br}-\text{H}_b)$ | $zpe$ | $E_{MP2}$    | $E_{e/BSSE}$ | $\Delta E_{e/BSSE}$ | $\Delta E_{e/BSSE/Corr}$ |
|-------------|---------------------------|--------------------------|--------------------------|-----------------------------------------|--------------------------------------|-------------------------------------------|-------|--------------|--------------|---------------------|--------------------------|
| <i>pvdz</i> | 2.467                     | 1.371                    | 1.353                    | 167.0                                   | 91.0                                 | 67.7                                      | 43.3  | -4168.096027 | -4168.082724 | <0.1                | 0.1                      |

HSH...SH2 Hbond angles = 142.7°

| Vibrational Frequencies |                        |
|-------------------------|------------------------|
|                         | <i>MP2/aug-cc-pvdz</i> |
| $\omega_1 a$            | 2720 <b>2</b>          |
| $\omega_2 a$            | 2549 <b>704</b>        |
| $\omega_3 a$            | 1178 <b>15</b>         |
| $\omega_4 a$            | 451 < <b>1</b>         |
| $\omega_5 a$            | 358 <b>4</b>           |
| $\omega_6 a$            | 258 <b>8</b>           |
| $\omega_7 a$            | 124 <b>12</b>          |
| $\omega_8 a$            | 58 <b>1</b>            |
| $\omega_9 b$            | 2727 <b>0</b>          |
| $\omega_{10} b$         | 2497 <b>0</b>          |
| $\omega_{11} b$         | 1192 <b>0</b>          |
| $\omega_{12} b$         | 463 <b>0</b>           |
| $\omega_{13} b$         | 251 <b>0</b>           |
| $\omega_{14} b$         | 173 <b>0</b>           |
| $\omega_{15} b$         | 90 <b>0</b>            |
| $\omega_{16} b$         | 74 <b>0</b>            |
| $\omega_{17} b$         | 17 <b>0</b>            |
| $\omega_{18} e$         | 2724 <b>61 (132)</b>   |
| $\omega_{19} e$         | 2502 <b>603 (1206)</b> |
| $\omega_{20} e$         | 1184 <b>11 (22)</b>    |
| $\omega_{21} e$         | 457 <b>16 (32)</b>     |
| $\omega_{22} e$         | 268 <b>7 (14)</b>      |
| $\omega_{23} e$         | 253 < <b>1 (1)</b>     |
| $\omega_{24} e$         | 110 <b>11 (22)</b>     |
| $\omega_{25} e$         | 65 <b>2 (4)</b>        |

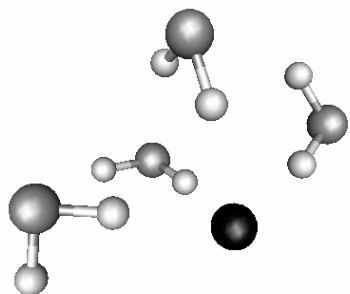

$C_1$  symmetry, minimum

|             | $r(\text{Br}-\text{H}_b)$ | $r(\text{S}-\text{H}_b)$ | $r(\text{S}-\text{H}_t)$ | $\theta(\text{Br}-\text{H}_b-\text{S})$ | $\theta(\text{H}-\text{S}-\text{H})$ | $\theta(\text{H}_b-\text{Br}-\text{H}_b)$ | $zpe$ | $E_{MP2}$    | $E_e/BSSE$   | $\Delta E_e/BSSE$ | $\Delta E_e/BSSE/Corr$ |
|-------------|---------------------------|--------------------------|--------------------------|-----------------------------------------|--------------------------------------|-------------------------------------------|-------|--------------|--------------|-------------------|------------------------|
| <i>pvdz</i> | 2.409 <i>l</i>            | 1.374                    | 1.351                    | 173.4                                   | 92.0                                 | 70.2 <i>l-b</i>                           | 43.0  | -4168.094283 | -4168.081239 | 0.9               | 0.7                    |
|             | 2.497 <i>b</i>            | 1.369                    | 1.354                    | 164.5                                   | 91.0                                 | 70.8 <i>b-t</i>                           |       |              |              |                   |                        |
|             | 2.461 <i>t</i>            | 1.370                    | 1.355                    | 165.2                                   | 91.0                                 | 70.4 <i>t-r</i>                           |       |              |              |                   |                        |
|             | 2.475 <i>r</i>            | 1.368                    | 1.353                    | 166.9                                   | 91.1                                 | 126.3 <i>r-l</i>                          |       |              |              |                   |                        |

HSH...SH2 Hbond angles = 143.5° *b-l*  
 146.8° *t-b*  
 143.1° *r-t*

| Vibrational Frequencies |                        |
|-------------------------|------------------------|
|                         | <i>MP2/aug-cc-pvdz</i> |
| $\omega_1 a$            | 2757 <b>2</b>          |
| $\omega_2 a$            | 2732 <b>20</b>         |
| $\omega_3 a$            | 2722 <b>26</b>         |
| $\omega_4 a$            | 2710 <b>33</b>         |
| $\omega_5 a$            | 2564 <b>622</b>        |
| $\omega_6 a$            | 2530 <b>397</b>        |
| $\omega_7 a$            | 2510 <b>308</b>        |
| $\omega_8 a$            | 2461 <b>697</b>        |
| $\omega_9 a$            | 1188 <b>9</b>          |
| $\omega_{10} a$         | 1186 <b>7</b>          |
| $\omega_{11} a$         | 1184 <b>7</b>          |
| $\omega_{12} a$         | 1182 <b>5</b>          |
| $\omega_{13} a$         | 470 <b>6</b>           |
| $\omega_{14} a$         | 447 <b>8</b>           |
| $\omega_{15} a$         | 442 <b>6</b>           |
| $\omega_{16} a$         | 402 <b>7</b>           |
| $\omega_{17} a$         | 342 <b>9</b>           |
| $\omega_{18} a$         | 261 <b>5</b>           |
| $\omega_{19} a$         | 258 < <b>1</b>         |
| $\omega_{20} a$         | 249 <b>5</b>           |
| $\omega_{21} a$         | 235 < <b>1</b>         |
| $\omega_{22} a$         | 230 <b>7</b>           |
| $\omega_{23} a$         | 194 <b>8</b>           |
| $\omega_{24} a$         | 141 <b>9</b>           |
| $\omega_{25} a$         | 125 <b>13</b>          |
| $\omega_{26} a$         | 113 <b>17</b>          |
| $\omega_{27} a$         | 99 <b>4</b>            |
| $\omega_{28} a$         | 92 < <b>1</b>          |
| $\omega_{29} a$         | 71 <b>2</b>            |
| $\omega_{30} a$         | 63 <b>1</b>            |
| $\omega_{31} a$         | 58 < <b>1</b>          |
| $\omega_{32} a$         | 26 < <b>1</b>          |
| $\omega_{33} a$         | 18 < <b>1</b>          |

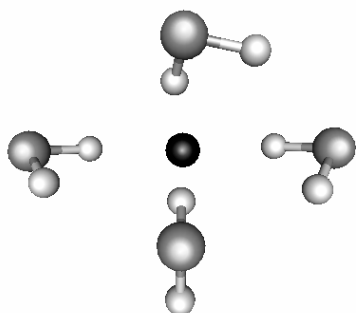

$C_1$  symmetry, minimum

|             | $r(\text{Br}-\text{H}_b)$ | $r(\text{S}-\text{H}_b)$ | $r(\text{S}-\text{H}_t)$ | $\theta(\text{Br}-\text{H}_b-\text{S})$ | $\theta(\text{H}-\text{S}-\text{H})$ | $\theta(\text{H}_b-\text{Br}-\text{H}_b)$ | $zpe$ | $E_{MP2}$    | $E_e/BSSE$   | $\Delta E_e/BSSE$ | $\Delta E_e/BSSE/Corr$ |
|-------------|---------------------------|--------------------------|--------------------------|-----------------------------------------|--------------------------------------|-------------------------------------------|-------|--------------|--------------|-------------------|------------------------|
| <i>pvdz</i> | 2.478 <i>l</i>            | 1.368                    | 1.352                    | 167.2                                   | 91.3                                 | 69.0 <i>l-f</i>                           | 43.0  | -4168.094026 | -4168.081028 | 1.1               | 0.9                    |
|             | 2.396 <i>f</i>            | 1.375                    | 1.351                    | 177.5                                   | 92.0                                 | 68.6 <i>f-r</i>                           |       |              |              |                   |                        |
|             | 2.466 <i>r</i>            | 1.370                    | 1.353                    | 167.2                                   | 91.1                                 | 72.1 <i>r-t</i>                           |       |              |              |                   |                        |
|             | 2.494 <i>t</i>            | 1.367                    | 1.353                    | 163.5                                   | 91.0                                 | 58.1 <i>t-l</i>                           |       |              |              |                   |                        |

HSH...SH<sub>2</sub> Hbond angles = 141.5° *l-f*  
 141.7° *r-f*  
 143.5° *t-r*

| Vibrational Frequencies |                        |
|-------------------------|------------------------|
|                         | <i>MP2/aug-cc-pvdz</i> |
| $\omega_1 a$            | 2751 <b>4</b>          |
| $\omega_2 a$            | 2738 <b>12</b>         |
| $\omega_3 a$            | 2729 <b>26</b>         |
| $\omega_4 a$            | 2726 <b>9</b>          |
| $\omega_5 a$            | 2573 <b>555</b>        |
| $\omega_6 a$            | 2541 <b>280</b>        |
| $\omega_7 a$            | 2511 <b>675</b>        |
| $\omega_8 a$            | 2437 <b>482</b>        |
| $\omega_9 a$            | 1190 <b>3</b>          |
| $\omega_{10} a$         | 1187 <b>11</b>         |
| $\omega_{11} a$         | 1185 <b>7</b>          |
| $\omega_{12} a$         | 1180 <b>3</b>          |
| $\omega_{13} a$         | 505 <b>7</b>           |
| $\omega_{14} a$         | 441 <b>7</b>           |
| $\omega_{15} a$         | 409 <b>2</b>           |
| $\omega_{16} a$         | 394 <b>11</b>          |
| $\omega_{17} a$         | 322 <b>7</b>           |
| $\omega_{18} a$         | 260 <b>15</b>          |
| $\omega_{19} a$         | 253 <b>5</b>           |
| $\omega_{20} a$         | 249 <b>1</b>           |
| $\omega_{21} a$         | 238 <b>1</b>           |
| $\omega_{22} a$         | 220 <b>6</b>           |
| $\omega_{23} a$         | 215 <b>11</b>          |
| $\omega_{24} a$         | 147 <b>1</b>           |
| $\omega_{25} a$         | 126 <b>15</b>          |
| $\omega_{26} a$         | 112 <b>15</b>          |
| $\omega_{27} a$         | 97 <b>4</b>            |
| $\omega_{28} a$         | 89 <b>&lt;1</b>        |
| $\omega_{29} a$         | 69 <b>1</b>            |
| $\omega_{30} a$         | 62 <b>&lt;1</b>        |
| $\omega_{31} a$         | 50 <b>1</b>            |
| $\omega_{32} a$         | 44 <b>&lt;1</b>        |
| $\omega_{33} a$         | 20 <b>&lt;1</b>        |



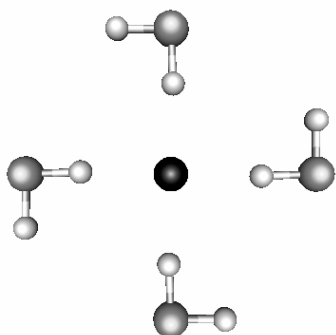

$C_{4h}$  symmetry, eight imaginary frequencies ( $2a_u, b_g, b_u, 2e_g, 2e_u$ )

|             | $r(\text{Br}-\text{H}_b)$ | $r(\text{S}-\text{H}_b)$ | $r(\text{S}-\text{H}_t)$ | $\theta(\text{Br}-\text{H}_b-\text{S})$ | $\theta(\text{H}-\text{S}-\text{H})$ | $\theta(\text{H}_b-\text{Br}-\text{H}_b)$ | $zpe$ | $E_{MP2}$    | $E_e/BSSE$   | $\Delta E_e/BSSE$ | $\Delta E_e/BSSE/Corr$ |
|-------------|---------------------------|--------------------------|--------------------------|-----------------------------------------|--------------------------------------|-------------------------------------------|-------|--------------|--------------|-------------------|------------------------|
| <i>pvdz</i> | 2.432                     | 1.370                    | 1.350                    | 176.2                                   | 92.3                                 | 90.0                                      | 41.2  | -4168.086645 | -4168.075955 | 4.2               | 2.2                    |

| Vibrational Frequencies |                          |
|-------------------------|--------------------------|
|                         | <i>MP2/aug-cc-pvdz</i>   |
| $\omega_1 a_g$          | 2764 <b>0</b>            |
| $\omega_2 a_g$          | 2540 <b>0</b>            |
| $\omega_3 a_g$          | 1185 <b>0</b>            |
| $\omega_4 a_g$          | 220 <b>0</b>             |
| $\omega_5 a_g$          | 90 <b>0</b>              |
| $\omega_6 a_u$          | 405 <b>9</b>             |
| $\omega_7 a_u$          | 5i <b>&lt;1</b>          |
| $\omega_8 a_u$          | 92i <b>39</b>            |
| $\omega_9 b_g$          | 2764 <b>0</b>            |
| $\omega_{10} b_g$       | 2498 <b>0</b>            |
| $\omega_{11} b_g$       | 1197 <b>0</b>            |
| $\omega_{12} b_g$       | 234 <b>0</b>             |
| $\omega_{13} b_g$       | 86 <b>0</b>              |
| $\omega_{14} b_g$       | 13i <b>0</b>             |
| $\omega_{15} b_u$       | 392 <b>0</b>             |
| $\omega_{16} b_u$       | 45 <b>0</b>              |
| $\omega_{17} b_u$       | 8i <b>0</b>              |
| $\omega_{18} e_g$       | 421 <b>0</b>             |
| $\omega_{19} e_g$       | 56i <b>0</b>             |
| $\omega_{20} e_u$       | 2764 <b>3 (6)</b>        |
| $\omega_{21} e_u$       | 2494 <b>1740 (3480)</b>  |
| $\omega_{22} e_u$       | 1187 <b>5 (10)</b>       |
| $\omega_{23} e_u$       | 218 <b>17 (34)</b>       |
| $\omega_{24} e_u$       | 117 <b>27 (54)</b>       |
| $\omega_{25} e_u$       | 11i <b>&lt;1 (&lt;1)</b> |

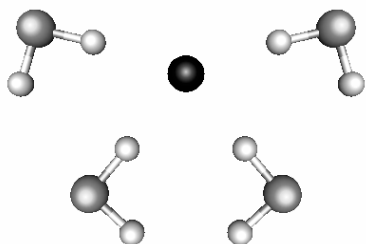

$C_{2v}$  symmetry, three imaginary frequencies ( $2a_2 + b_1$ )

|             | $r(\text{Br}-\text{H}_b)$        | $r(\text{S}-\text{H}_b)$ | $r(\text{S}-\text{H}_t)$ | $\theta(\text{Br}-\text{H}_b-\text{S})$ | $\theta(\text{H}-\text{S}-\text{H})$ | $\theta(\text{H}_b-\text{Br}-\text{H}_b)$              | $zpe$ | $E_{MP2}$    | $E_e/BSSE$   | $\Delta E_e/BSSE$ | $\Delta E_e/BSSE/Corr$ |
|-------------|----------------------------------|--------------------------|--------------------------|-----------------------------------------|--------------------------------------|--------------------------------------------------------|-------|--------------|--------------|-------------------|------------------------|
| <i>pvdz</i> | 2.466 <i>t</i><br>2.406 <i>b</i> | 1.369<br>1.374           | 1.350<br>1.349           | 173.9<br>179.0                          | 92.4<br>92.8                         | 150.5 <i>t-t</i><br>67.7 <i>t-b</i><br>74.2 <i>b-b</i> | 41.7  | -4168.088135 | -4168.076283 | 4.0               | 2.5                    |

*t*=top, *b*=bottom.

HSH...SH2 Hbond angles = 134.9° *t-b*

| Vibrational Frequencies |                        |
|-------------------------|------------------------|
|                         | <i>MP2/aug-cc-pvdz</i> |
| $\omega_1 a_1$          | 2767 <b>3</b>          |
| $\omega_2 a_1$          | 2759 <b>1</b>          |
| $\omega_3 a_1$          | 2550 <b>3</b>          |
| $\omega_4 a_1$          | 2468 <b>1024</b>       |
| $\omega_5 a_1$          | 1204 < <b>1</b>        |
| $\omega_6 a_1$          | 1190 <b>1</b>          |
| $\omega_7 a_1$          | 267 <b>35</b>          |
| $\omega_8 a_1$          | 253 <b>1</b>           |
| $\omega_9 a_1$          | 114 <b>14</b>          |
| $\omega_{10} a_1$       | 90 <b>1</b>            |
| $\omega_{11} a_1$       | 50 < <b>1</b>          |
| $\omega_{12} a_1$       | 25 < <b>1</b>          |
| $\omega_{13} a_2$       | 422 <b>0</b>           |
| $\omega_{14} a_2$       | 380 <b>0</b>           |
| $\omega_{15} a_2$       | 64 <b>0</b>            |
| $\omega_{16} a_2$       | 27i <b>0</b>           |
| $\omega_{17} a_2$       | 195i <b>0</b>          |
| $\omega_{18} b_1$       | 430 <b>3</b>           |
| $\omega_{19} b_1$       | 389 <b>3</b>           |
| $\omega_{20} b_1$       | 108 < <b>1</b>         |
| $\omega_{21} b_1$       | 5 < <b>1</b>           |
| $\omega_{22} b_1$       | 140i <b>35</b>         |
| $\omega_{23} b_2$       | 2764 <b>5</b>          |
| $\omega_{24} b_2$       | 2759 <b>1</b>          |
| $\omega_{25} b_2$       | 2522 <b>1452</b>       |
| $\omega_{26} b_2$       | 2446 <b>608</b>        |
| $\omega_{27} b_2$       | 1200 <b>5</b>          |
| $\omega_{28} b_2$       | 1182 < <b>1</b>        |
| $\omega_{29} b_2$       | 249 <b>9</b>           |
| $\omega_{30} b_2$       | 242 < <b>1</b>         |
| $\omega_{31} b_2$       | 123 <b>38</b>          |
| $\omega_{32} b_2$       | 86 < <b>1</b>          |
| $\omega_{33} b_2$       | 46 < <b>1</b>          |

## *Calculated data for Cl<sup>-</sup>-(H<sub>2</sub>S)<sub>n</sub> clusters (n=1-4)*

Key:

Calculations were performed at either the MP2/aug-cc-pvdz or MP2/aug-cc-pvtz levels of theory. The data are labeled pvdz or pvtz in the tables

Bond lengths are denoted  $r(\text{A-B})$ , and are given in Ångström ( $10^{-10}$  metre)

Angles are denoted by  $\theta(\text{A-B-C})$ , and are given in degrees

Zero point energy (zpe), given in kcal/mol

$E_{\text{MP2}}$  and  $E_{\text{e/BSSE}}$  are the electronic energies (MP2, and MP2 corrected for Basis Set Superposition Error), in units of hartrees.

$\Delta E_{\text{e/BSSE}}$  is the energy separation between stationary points of the same cluster size.  $\Delta E_{\text{e/BSSE/Corr}}$  is corrected for zpe differences, both are given in kcal/mol

$\Delta H_{n \rightarrow n+1}^{295\text{K}}$  is the enthalpy change for ligand association, in kcal/mol. This is also termed the ligand binding energy in the paper.

Vibrational data given in units of  $\text{cm}^{-1}$ , while the infrared intensities are in  $\text{km/mol}$  (bold text following the vibrational wavenumber)

## Dimer Structures: Cl-H<sub>2</sub>S

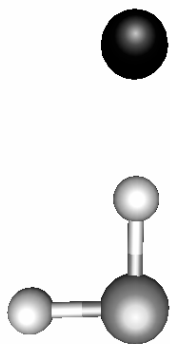

C<sub>s</sub> symmetry minimum

|                | MP2/aug-cc-pvdz  | MP2/aug-cc-pvtz  |
|----------------|------------------|------------------|
| $\omega_1 a'$  | 2760 <b>6</b>    | 2778 <b>3</b>    |
| $\omega_2 a'$  | 2004 <b>2683</b> | 1941 <b>2938</b> |
| $\omega_3 a'$  | 1178 <b>4</b>    | 1194 <b>6</b>    |
| $\omega_4 a'$  | 312 <b>7</b>     | 328 <b>6</b>     |
| $\omega_5 a'$  | 152 <b>93</b>    | 169 <b>100</b>   |
| $\omega_6 a''$ | 597 <b>2</b>     | 626 <b>1</b>     |

|             | $r(\text{Cl} \dots \text{H}_b)$ | $r(\text{S}-\text{H}_b)$ | $r(\text{S}-\text{H}_t)$ | $\theta(\text{Cl}-\text{H}_b-\text{S})$ | $\theta(\text{H}-\text{S}-\text{H})$ | $zpe$ | $E_{\text{MP2}}$ | $E_e/\text{BSSE}$ | $\Delta E_e/\text{BSSE}$ | $\Delta E_e/\text{BSSE}/\text{Corr}$ | $\Delta H_{0, \downarrow}^{295\text{K}}$ |
|-------------|---------------------------------|--------------------------|--------------------------|-----------------------------------------|--------------------------------------|-------|------------------|-------------------|--------------------------|--------------------------------------|------------------------------------------|
| <i>pvdz</i> | 2.034                           | 1.412                    | 1.349                    | 178.4                                   | 92.6                                 | 10.0  | -858.597639      | -858.595654       | 0.0                      | 0.0                                  | -12.7                                    |
| <i>pvtz</i> | 1.990                           | 1.407                    | 1.336                    | 178.4                                   | 92.4                                 | 10.1  | -858.712218      | -858.710652       | 0.0                      | 0.0                                  | -13.6                                    |

### VSCF and LEVEL 7.5 for Cl-H<sub>2</sub>S at MP2/aug-cc-pvdz and -pvtz

|                        | $\omega_1 a'$  | $\omega_2 a'$    | $\omega_3 a'$ | $\omega_4 a'$ | $\omega_5 a'$  | $\omega_6 a''$ | $zpe$ |
|------------------------|----------------|------------------|---------------|---------------|----------------|----------------|-------|
| <b>MP2/aug-cc-pvdz</b> |                |                  |               |               |                |                |       |
| harmonic               | 2760 <b>6</b>  | 2004 <b>2683</b> | 1178 <b>4</b> | 312 <b>7</b>  | 152 <b>93</b>  | 597 <b>2</b>   | 10.0  |
| vscf                   | 2644           | 1520             | 1149          | 449           | 155            | 674            | 9.4   |
| cc-vscf                | 2649 <b>6</b>  | 1437 <b>2920</b> | 1148 <b>4</b> | 440 <b>6</b>  | 154 <b>97</b>  | 670 <b>2</b>   | 9.3   |
| cc-vscf-qff            | 2660 <b>6</b>  | 1500 <b>3019</b> | 1140 <b>4</b> | 470 <b>6</b>  | 147 <b>97</b>  | 679 <b>2</b>   |       |
| <b>MP2/aug-cc-pvtz</b> |                |                  |               |               |                |                |       |
| harmonic               | 2778 <b>3</b>  | 1941 <b>2938</b> | 1194 <b>6</b> | 328 <b>6</b>  | 169 <b>100</b> | 626 <b>1</b>   | 10.1  |
| Vscf                   | 2662           | 1425             | 1159          | 438           | 172            | 676            | 9.3   |
| cc-vscf                | 2669 <b>4</b>  | 1389 <b>3063</b> | 1156 <b>6</b> | 425 <b>5</b>  | 170 <b>105</b> | 670 <b>1</b>   | 9.3   |
| cc-vscf-qff            | 2675 <b>11</b> | 1664 <b>3162</b> | 1151 <b>4</b> | 465 <b>8</b>  | 165 <b>101</b> | 686 <b>5</b>   |       |
| LEVEL 7.5              |                | 1438             |               |               |                |                |       |

### Data for H<sub>2</sub>S and Cl<sup>-</sup> at MP2/aug-cc-pvdz and -pvtz

|                                        | H <sub>2</sub> S   |                    | Cl <sup>-</sup>    |                    |
|----------------------------------------|--------------------|--------------------|--------------------|--------------------|
|                                        | <i>aug-cc-pvdz</i> | <i>aug-cc-pvtz</i> | <i>aug-cc-pvdz</i> | <i>aug-cc-pvtz</i> |
| $r(\text{S}-\text{H})^a$               | 1.350 (14)         | 1.336 (0)          |                    |                    |
| $\theta(\text{H}-\text{S}-\text{H})^a$ | 92.5 (4)           | 92.2 (1)           |                    |                    |
| $\omega_1 (a_1)$                       | 2755 <1            | 2773 <1            |                    |                    |
| $\omega_2 (a_1)$                       | 1193 <b>1</b>      | 1211 <b>1</b>      |                    |                    |
| $\omega_3 (b_2)$                       | 2780 <1            | 2793 <b>1</b>      |                    |                    |
| $zpe$                                  | 9.6                | 9.7                |                    |                    |
| $E_{\text{MP2}}$                       | -398.853219        | -398.9088179       | -459.722765        | -459.780792        |

<sup>a</sup> Numbers in parentheses are differences between calculated and experimental values taken from; T. H. Edwards, N. K. Moncur and L. E. Snyder, *J. Chem. Phys.*, 1967, **46**, 2139

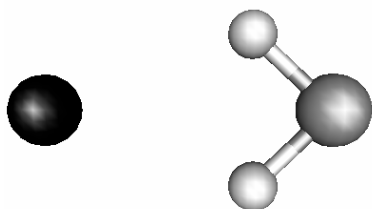

$C_{2v}$  symmetry, 1 imaginary frequency ( $b_2$ )

|             | $r(Cl...H_b)$ | $r(S-H_b)$ | $\theta(Cl-H_b-S)$ | $\theta(H-S-H)$ | $zpe$ | $E_{MP2}$   | $E_e/BSSE$  | $\Delta E_e/BSSE$ | $\Delta E_e/BSSE/Corr$ |
|-------------|---------------|------------|--------------------|-----------------|-------|-------------|-------------|-------------------|------------------------|
| <i>pvdz</i> | 2.749         | 1.356      | 116.7              | 86.9            | 10.1  | -858.591679 | -858.590587 | 3.2               | 3.3                    |
| <i>pvtz</i> | 2.685         | 1.343      | 116.7              | 86.5            | 10.1  | -858.705797 | -858.705005 | 3.5               | 3.5                    |

|                | <i>MP2/aug-cc-pvdz</i> | <i>MP2/aug-cc-pvtz</i> |
|----------------|------------------------|------------------------|
| $\omega_1 a_1$ | 2716 <b>105</b>        | 2725 <b>131</b>        |
| $\omega_2 a_1$ | 1095 <b>78</b>         | 1107 <b>80</b>         |
| $\omega_3 a_1$ | 122 <b>28</b>          | 126 <b>29</b>          |
| $\omega_4 b_1$ | 406 <b>9.7</b>         | 416 <b>7</b>           |
| $\omega_5 b_2$ | 2705 <b>2</b>          | 2707 <b>3</b>          |
| $\omega_6 b_2$ | 292i <b>14</b>         | 307i <b>12</b>         |

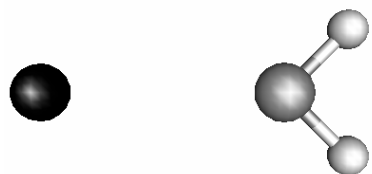

$C_{2v}$  symmetry, 1 imaginary frequency ( $b_2$ )

|             | $r(Cl...S)$ | $r(S-H_t)$ | $\theta(Cl-S-H_t)$ | $\theta(H-S-H)$ | $zpe$ | $E_{MP2}$   | $E_e/BSSE$  | $\Delta E_e/BSSE$ | $\Delta E_e/BSSE/Corr$ |
|-------------|-------------|------------|--------------------|-----------------|-------|-------------|-------------|-------------------|------------------------|
| <i>pvdz</i> | 3.740       | 1.355      | 135.0              | 90.1            | 9.9   | -858.574752 | -858.574368 | 13.4              | 13.3                   |
| <i>pvtz</i> | 3.662       | 1.341      | 135.1              | 89.8            | 10.0  | -858.689074 | -858.688756 | 13.7              | 13.6                   |

|                | <i>MP2/aug-cc-pvdz</i> | <i>MP2/aug-cc-pvtz</i> |
|----------------|------------------------|------------------------|
| $\omega_1 a_1$ | 2713 <b>37</b>         | 2732 <b>34</b>         |
| $\omega_2 a_1$ | 1189 <b>5</b>          | 1209 <b>6</b>          |
| $\omega_3 a_1$ | 48 <b>21</b>           | 54 <b>22</b>           |
| $\omega_4 b_1$ | 210 <b>28</b>          | 212 <b>26</b>          |
| $\omega_5 b_2$ | 2740 <b>10</b>         | 2754 <b>6</b>          |
| $\omega_6 b_2$ | 179i <b>6</b>          | 184i <b>5</b>          |

## Trimer Structures: $\text{Cl}^-(\text{H}_2\text{S})_2$

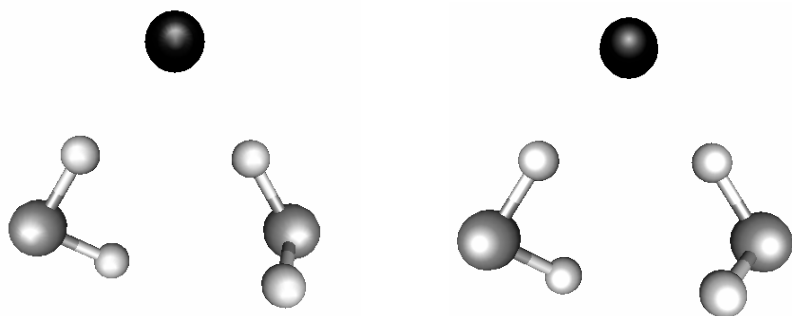

pVDZ

pVTZ both  $C_1$  symmetry, both minima

|             | $r(\text{Cl}\dots\text{H}_b)$    | $r(\text{S}-\text{H}_b)$ | $R(\text{S}-\text{H}_l)$ | $\theta(\text{Cl}-\text{H}_b-\text{S})$ | $\theta(\text{H}-\text{S}-\text{H})$ | $zpe$ | $E_{MP2}$    | $E_{e/BSSE}$ | $\Delta E_{e/BSSE}$ | $\Delta E_{e/BSSE/Corr}$ | $\Delta H_{1,2}^{295K}$ |
|-------------|----------------------------------|--------------------------|--------------------------|-----------------------------------------|--------------------------------------|-------|--------------|--------------|---------------------|--------------------------|-------------------------|
| <i>pvdz</i> | 2.200 <i>D</i><br>2.118 <i>A</i> | 1.383<br>1.394           | 1.351<br>1.350           | 170.6<br>175.9                          | 91.2<br>92.3                         | 21.0  | -1257.470562 | -1257.466224 | 0.0                 | 0.0                      | -9.6                    |
| <i>pvtz</i> | 2.126 <i>l</i><br>2.097 <i>r</i> | 1.379<br>1.383           | 1.338<br>1.337           | 173.3<br>175.2                          | 91.5<br>91.9                         | 21.1  | -1257.641028 | -1257.638018 | 0.0                 | 0.0                      | -10.5                   |

*D*=H-bond donor, *A*=H-bond acceptor

*l*=left, *r*=right

HSH...SH<sub>2</sub> Hbond angles

132.9° (apvdz)

123.2° (apvtz)

|                 | <i>MP2/aug-cc-pvdz</i> | <i>MP2/aug-cc-pvtz</i> |
|-----------------|------------------------|------------------------|
| $\omega_1 a$    | 2759 <b>2</b>          | 2774 < <b>1</b>        |
| $\omega_2 a$    | 2744 <b>6</b>          | 2767 <b>2</b>          |
| $\omega_3 a$    | 2362 <b>1259</b>       | 2293 <b>1725</b>       |
| $\omega_4 a$    | 2196 <b>1359</b>       | 2182 <b>1181</b>       |
| $\omega_5 a$    | 1187 <b>12</b>         | 1206 <b>9</b>          |
| $\omega_6 a$    | 1181 <b>5</b>          | 1197 <b>6</b>          |
| $\omega_7 a$    | 561 <b>7</b>           | 570 <b>4</b>           |
| $\omega_8 a$    | 500 <b>3</b>           | 543 <b>3</b>           |
| $\omega_9 a$    | 290 <b>8</b>           | 311 <b>7</b>           |
| $\omega_{10} a$ | 276 <b>5</b>           | 291 <b>6</b>           |
| $\omega_{11} a$ | 227 <b>1</b>           | 225 <b>1</b>           |
| $\omega_{12} a$ | 158 <b>59</b>          | 171 <b>60</b>          |
| $\omega_{13} a$ | 120 <b>37</b>          | 130 <b>40</b>          |
| $\omega_{14} a$ | 60 <b>1</b>            | 59 <b>1</b>            |
| $\omega_{15} a$ | 44 <b>11</b>           | 19 <b>13</b>           |

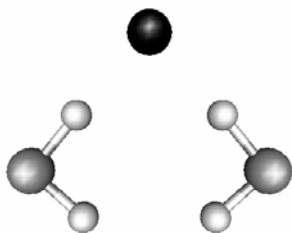

$C_{2v}$  symmetry, one imaginary frequency ( $a_2$ )

|             | $r(Cl...H_b)$ | $r(S-H_b)$ | $r(S-H_t)$ | $\theta(Cl-H_b-S)$ | $\theta(H-S-H)$ | $\theta(H_b-Cl-H_b)$ | $zpe$ | $E_{MP2}$    | $E_{e/BSSE}$ | $\Delta E_{e/BSSE}$ | $\Delta E_{e/BSSE/Corr}$ |
|-------------|---------------|------------|------------|--------------------|-----------------|----------------------|-------|--------------|--------------|---------------------|--------------------------|
| <i>pvdz</i> | 2.141         | 1.391      | 1.350      | 177.8              | 92.7            | 82.5                 | 20.6  | -1257.469196 | -1257.465062 | 0.7                 | 0.3                      |
| <i>pvtz</i> | 2.100         | 1.383      | 1.336      | 177.8              | 92.5            | 83.2                 | 20.7  | -1257.639626 | -1257.636697 | 0.8                 | 0.4                      |

|                   | <i>MP2/aug-cc-pvdz</i> | <i>MP2/aug-cc-pvtz</i> |
|-------------------|------------------------|------------------------|
| $\omega_1 a_1$    | 2763 <b>3</b>          | 2779 <b>2</b>          |
| $\omega_2 a_1$    | 2293 <b>1597</b>       | 2260 <b>1721</b>       |
| $\omega_3 a_1$    | 1197 <b>4</b>          | 1214 <b>5</b>          |
| $\omega_4 a_1$    | 300 <b>21</b>          | 319 <b>19</b>          |
| $\omega_5 a_1$    | 154 <b>50</b>          | 166 <b>51</b>          |
| $\omega_6 a_1$    | 39 < <b>1</b>          | 37 < <b>1</b>          |
| $\omega_7 a_2$    | 520 <b>0</b>           | 543 <b>0</b>           |
| $\omega_8 a_2$    | 153i <b>0</b>          | 155i <b>0</b>          |
| $\omega_9 b_1$    | 532 <b>4</b>           | 556 <b>2</b>           |
| $\omega_{10} b_1$ | 63 <b>13</b>           | 58 <b>11</b>           |
| $\omega_{11} b_2$ | 2760 <b>7</b>          | 2777 <b>3</b>          |
| $\omega_{12} b_2$ | 2213 <b>1380</b>       | 2168 <b>1553</b>       |
| $\omega_{13} b_2$ | 1182 < <b>1</b>        | 1199 < <b>1</b>        |
| $\omega_{14} b_2$ | 273 <b>2</b>           | 283 <b>2</b>           |
| $\omega_{15} b_2$ | 125 <b>44</b>          | 135 <b>48</b>          |

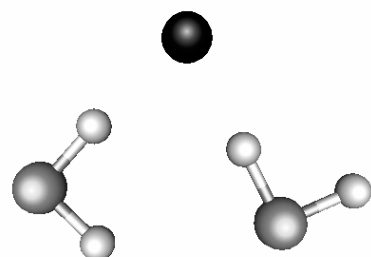

$C_s$  symmetry, one imaginary frequency ( $a''$ )

|             | $r(Cl...H_b)$  | $r(S-H_b)$ | $r(S-H_t)$ | $\theta(Cl-H_b-S)$ | $\theta(H-S-H)$ | $zpe$ | $E_{MP2}$    | $E_{e/BSSE}$ | $\Delta E_{e/BSSE}$ | $\Delta E_{e/BSSE/Corr}$ |
|-------------|----------------|------------|------------|--------------------|-----------------|-------|--------------|--------------|---------------------|--------------------------|
| <i>pvdz</i> | 2.178 <i>l</i> | 1.386      | 1.350      | 175.0              | 92.4            | 20.7  | -1257.469229 | -1257.465010 | 0.8                 | 0.5                      |
|             | 2.126 <i>r</i> | 1.393      | 1.349      | 179.6              | 92.7            |       |              |              |                     |                          |
| <i>pvtz</i> | 2.132 <i>l</i> | 1.378      | 1.337      | 175.3              | 92.3            | 20.9  | -1257.639696 | -1257.636733 | 0.8                 | 0.6                      |
|             | 2.082 <i>r</i> | 1.386      | 1.336      | 179.2              | 92.5            |       |              |              |                     |                          |

|                   | <i>MP2/aug-cc-pvdz</i> | <i>MP2/aug-cc-pvtz</i> |
|-------------------|------------------------|------------------------|
| $\omega_1 a'$     | 2764 <b>5</b>          | 2778 <b>3</b>          |
| $\omega_2 a'$     | 2756 <b>1</b>          | 2771 < <b>1</b>        |
| $\omega_3 a'$     | 2332 <b>1443</b>       | 2297 <b>1608</b>       |
| $\omega_4 a'$     | 2210 <b>1353</b>       | 2161 <b>1466</b>       |
| $\omega_5 a'$     | 1203 <b>4</b>          | 1222 <b>5</b>          |
| $\omega_6 a'$     | 1183 < <b>1</b>        | 1201 < <b>1</b>        |
| $\omega_7 a'$     | 299 <b>6</b>           | 321 <b>5</b>           |
| $\omega_8 a'$     | 293 <b>16</b>          | 309 <b>16</b>          |
| $\omega_9 a'$     | 157 <b>58</b>          | 171 <b>61</b>          |
| $\omega_{10} a'$  | 119 <b>34</b>          | 128 <b>37</b>          |
| $\omega_{11} a'$  | 42 <b>1</b>            | 42 <b>1</b>            |
| $\omega_{12} a''$ | 533 <b>2</b>           | 558 <b>1</b>           |
| $\omega_{13} a''$ | 497 <b>1</b>           | 521 < <b>1</b>         |
| $\omega_{14} a''$ | 104 < <b>1</b>         | 105 < <b>1</b>         |
| $\omega_{15} a''$ | 135i <b>21</b>         | 139i <b>19</b>         |

HSH...SH<sub>2</sub> Hbond angles

130.1° (apvdz)

29.9° (apvtz)

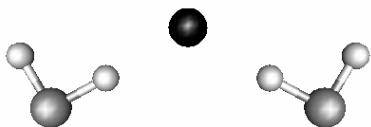

$C_{2v}$  symmetry, two imaginary frequencies ( $a_2$  and  $b_1$ )

|                   | MP2/aug-cc-pvdz  | MP2/aug-cc-pvtz  |
|-------------------|------------------|------------------|
| $\omega_1 a_1$    | 2764 <b>7</b>    | 2781 <b>3</b>    |
| $\omega_2 a_1$    | 2311 <b>543</b>  | 2278 <b>442</b>  |
| $\omega_3 a_1$    | 1190 <b>3</b>    | 1206 <b>5</b>    |
| $\omega_4 a_1$    | 278 <b>4</b>     | 293 <b>5</b>     |
| $\omega_5 a_1$    | 125 <b>16</b>    | 131 <b>12</b>    |
| $\omega_6 a_1$    | 9 <b>2</b>       | 8 <b>2</b>       |
| $\omega_7 a_2$    | 520 <b>0</b>     | 548 <b>0</b>     |
| $\omega_8 a_2$    | 36i <b>0</b>     | 33i <b>0</b>     |
| $\omega_9 b_1$    | 518 <b>6</b>     | 541 <b>4</b>     |
| $\omega_{10} b_1$ | 15i <b>23</b>    | 18i <b>21</b>    |
| $\omega_{11} b_2$ | 2764 < <b>1</b>  | 2781 < <b>1</b>  |
| $\omega_{12} b_2$ | 2250 <b>2907</b> | 2204 <b>3519</b> |
| $\omega_{13} b_2$ | 1185 <b>6</b>    | 1201 <b>8</b>    |
| $\omega_{14} b_2$ | 269 <b>13</b>    | 283 <b>9</b>     |
| $\omega_{15} b_2$ | 145 <b>97</b>    | 162 <b>119</b>   |

|             | $r(Cl...H_b)$ | $r(S-H_b)$ | $r(S-H_t)$ | $\theta(Cl-H_b-S)$ | $\theta(H-S-H)$ | $\theta(H_b-Cl-H_b)$ | $zpe$ | $E_{MP2}$    | $E_{e/BSSE}$ | $\Delta E_{e/BSSE}$ | $\Delta E_{e/BSSE/Corr}$ |
|-------------|---------------|------------|------------|--------------------|-----------------|----------------------|-------|--------------|--------------|---------------------|--------------------------|
| <i>pvdz</i> | 2.153         | 1.388      | 1.349      | 176.6              | 92.5            | 116.5                | 20.5  | -1257.468413 | -1257.464811 | 0.9                 | 0.4                      |
| <i>pvtz</i> | 2.107         | 1.381      | 1.336      | 176.9              | 92.3            | 124.6                | 20.6  | -1257.638973 | -1257.636283 | 1.1                 | 0.6                      |



## Tetramer Structures: $\text{Cl}^-(\text{H}_2\text{S})_3$

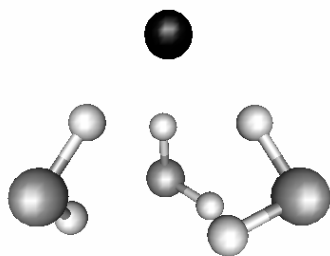

|                 | MP2/aug-cc-pvdz  | MP2/aug-cc-pvtz        |
|-----------------|------------------|------------------------|
| $\omega_1 a$    | 2725 <b>1</b>    | 2741 <b>1</b>          |
| $\omega_2 a$    | 2460 <b>1128</b> | 2443 <b>1243</b>       |
| $\omega_3 a$    | 1185 <b>14</b>   | 1200 <b>14</b>         |
| $\omega_4 a$    | 496 < <b>1</b>   | 517 < <b>1</b>         |
| $\omega_5 a$    | 332 < <b>1</b>   | 325 < <b>1</b>         |
| $\omega_6 a$    | 285 <b>7</b>     | 291 <b>6</b>           |
| $\omega_7 a$    | 162 <b>45</b>    | 171 <b>46</b>          |
| $\omega_8 a$    | 76 <b>2</b>      | 75 <b>1</b>            |
| $\omega_9 e$    | 2730 <b>25</b>   | 2745 <b>30 (60)</b>    |
| $\omega_{10} e$ | 2389 <b>494</b>  | 2360 <b>560 (1120)</b> |
| $\omega_{11} e$ | 1183 <b>12</b>   | 1199 <b>11 (22)</b>    |
| $\omega_{12} e$ | 500 <b>13</b>    | 522 <b>12 (24)</b>     |
| $\omega_{13} e$ | 267 <b>2</b>     | 277 <b>2 (4)</b>       |
| $\omega_{14} e$ | 209 <b>9</b>     | 204 <b>9 (18)</b>      |
| $\omega_{15} e$ | 115 <b>18</b>    | 119 <b>19 (38)</b>     |
| $\omega_{16} e$ | 59 <b>1</b>      | 58 <b>1 (2)</b>        |

$C_3$  symmetry, minimum

|             | $r(\text{Cl}-\text{H}_b)$ | $r(\text{S}-\text{H}_b)$ | $r(\text{S}-\text{H}_t)$ | $\theta(\text{Cl}-\text{H}_b-\text{S})$ | $\theta(\text{H}-\text{S}-\text{H})$ | $\theta(\text{H}_b-\text{Cl}-\text{H}_b)$ | $zpe$ | $E_{\text{MP2}}$ | $E_{e/\text{BSSE}}$ | $\Delta E_{e/\text{BSSE}}$ | $\Delta E_{e/\text{BSSE}/\text{Corr}}$ | $\Delta H_{298}^{\text{295K}}$ |
|-------------|---------------------------|--------------------------|--------------------------|-----------------------------------------|--------------------------------------|-------------------------------------------|-------|------------------|---------------------|----------------------------|----------------------------------------|--------------------------------|
| <i>pvdz</i> | 2.243                     | 1.378                    | 1.353                    | 168.0                                   | 90.9                                 | 74.6                                      | 32.4  | -1656.343825     | -1656.336280        | 0.0                        | 0.0                                    | -9.2                           |
| <i>pvtz</i> | 2.201                     | 1.369                    | 1.340                    | 169.1                                   | 90.9                                 | 74.5                                      | 32.5  | -1656.569665     | -1656.564937        | 0.0                        | 0.0                                    | -10.0                          |

HSH...SH<sub>2</sub> Hbond angle = 138.8° (apvdz)  
137.8° (apvtz)

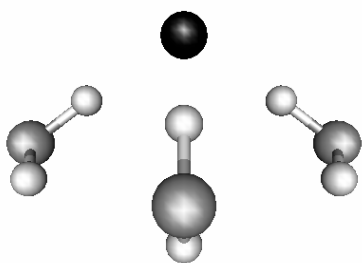

$C_s$  symmetry, minimum

|                   | MP2/aug-cc-pvtz  | MP2/aug-cc-pvdz  |
|-------------------|------------------|------------------|
| $\omega_1 a'$     | 2754 <b>1</b>    | 2772 < <b>1</b>  |
| $\omega_2 a'$     | 2746 <b>3</b>    | 2761 <b>6</b>    |
| $\omega_3 a'$     | 2469 <b>574</b>  | 2449 <b>658</b>  |
| $\omega_4 a'$     | 2300 <b>795</b>  | 2275 <b>818</b>  |
| $\omega_5 a'$     | 1191 <b>5</b>    | 1207 <b>6</b>    |
| $\omega_6 a'$     | 1179 <b>1</b>    | 1197 <b>2</b>    |
| $\omega_7 a'$     | 472 <b>3</b>     | 492 <b>2</b>     |
| $\omega_8 a'$     | 277 <b>10</b>    | 290 <b>8</b>     |
| $\omega_9 a'$     | 252 <b>7</b>     | 268 <b>7</b>     |
| $\omega_{10} a'$  | 194 <b>5</b>     | 192 <b>5</b>     |
| $\omega_{11} a'$  | 153 <b>40</b>    | 163 <b>39</b>    |
| $\omega_{12} a'$  | 102 <b>8</b>     | 106 <b>9</b>     |
| $\omega_{13} a'$  | 57 <b>1</b>      | 56 <b>1</b>      |
| $\omega_{14} a'$  | 11 < <b>1</b>    | 9 < <b>1</b>     |
| $\omega_{15} a''$ | 2746 <b>5</b>    | 2761 <b>8</b>    |
| $\omega_{16} a''$ | 2425 <b>1254</b> | 2396 <b>1428</b> |
| $\omega_{17} a''$ | 1189 <b>17</b>   | 1205 <b>16</b>   |
| $\omega_{18} a''$ | 543 <b>9</b>     | 569 <b>8</b>     |
| $\omega_{19} a''$ | 459 <b>3</b>     | 478 <b>2</b>     |
| $\omega_{20} a''$ | 268 < <b>1</b>   | 278 < <b>1</b>   |
| $\omega_{21} a''$ | 246 <b>1</b>     | 248 <b>1</b>     |
| $\omega_{22} a''$ | 136 <b>54</b>    | 142 <b>57</b>    |
| $\omega_{23} a''$ | 64 < <b>1</b>    | 64 < <b>1</b>    |
| $\omega_{24} a''$ | 31 <b>15</b>     | 27 <b>15</b>     |

|             | $r(Cl \dots H_b)$                | $r(S-H_b)$     | $r(S-H_t)$     | $\theta(Cl-H_b-S)$ | $\theta(H-S-H)$ | $\theta(H_b-Cl-H_b)$                | $zpe$ | $E_{MP2}$    | $E_{e/BSSE}$ | $\Delta E_{e/BSSE}$ | $\Delta E_{e/BSSE/Corr}$ |
|-------------|----------------------------------|----------------|----------------|--------------------|-----------------|-------------------------------------|-------|--------------|--------------|---------------------|--------------------------|
| <i>pvdz</i> | 2.256 <i>D</i><br>2.171 <i>A</i> | 1.376<br>1.386 | 1.351<br>1.351 | 170.1<br>174.4     | 91.3<br>92.0    | 113.3 <i>D-D</i><br>73.6 <i>D-A</i> | 31.8  | -1656.341390 | -1656.334728 | 1.0                 | 0.4                      |
| <i>pvtz</i> | 2.216 <i>D</i><br>2.137 <i>A</i> | 1.366<br>1.377 | 1.338<br>1.337 | 171.1<br>174.2     | 91.3<br>91.8    | 113.4 <i>D-D</i><br>73.6 <i>D-A</i> | 32.0  | -1656.567430 | -1656.563058 | 1.2                 | 0.7                      |

*D*=H-bond donors, *A*=H-bond acceptor

HSH...SH<sub>2</sub> Hbond angle = 132.6° (apvdz)  
131.4° (apvtz)

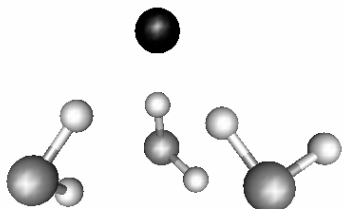

$C_1$  symmetry, minimum

|             | $r(Cl...H_b)$  | $r(S-H_b)$ | $r(S-H_l)$ | $\theta(Cl-H_b-S)$ | $\theta(H-S-H)$ | $\theta(H_b-Cl-H_b)$ | $zpe$ | $E_{MP2}$    | $E_{e/BSSE}$ | $\Delta E_{e/BSSE}$ | $\Delta E_{e/BSSE/Corr}$ |
|-------------|----------------|------------|------------|--------------------|-----------------|----------------------|-------|--------------|--------------|---------------------|--------------------------|
| <i>pvdz</i> | 2.258 <i>l</i> | 1.375      | 1.352      | 167.9              | 91.0            | 74.9 <i>l-m</i>      | 32.1  | -1656.341928 | -1656.334790 | 0.9                 | 0.6                      |
|             | 2.257 <i>b</i> | 1.377      | 1.353      | 167.6              | 90.9            | 73.9 <i>m-r</i>      |       |              |              |                     |                          |
|             | 2.199 <i>r</i> | 1.382      | 1.351      | 174.4              | 92.1            | 72.0 <i>r-l</i>      |       |              |              |                     |                          |
| <i>pvtz</i> | 2.217 <i>l</i> | 1.365      | 1.339      | 168.8              | 91.0            | 75.0 <i>l-m</i>      | 32.3  | -1656.567840 | -1656.563262 | 1.1                 | 0.9                      |
|             | 2.212 <i>b</i> | 1.368      | 1.340      | 168.6              | 90.8            | 73.8 <i>m-r</i>      |       |              |              |                     |                          |
|             | 2.161 <i>r</i> | 1.373      | 1.337      | 175.5              | 92.0            | 71.7 <i>r-l</i>      |       |              |              |                     |                          |

*l*=left, *b*=back, *r*=right

HSH...SH<sub>2</sub> Hbond angle = 139.3° *l-b* (apvdz)

138.1° *l-b* (apvtz)

139.5° *b-r* (apvdz)

138.6° *b-r* (apvtz)

|                 | <i>MP2/aug-cc-pvdz</i> | <i>MP2/aug-cc-pvdz</i> |
|-----------------|------------------------|------------------------|
| $\omega_1 a$    | 2756 <b>4</b>          | 2771 <b>2</b>          |
| $\omega_2 a$    | 2736 <b>16</b>         | 2751 <b>18</b>         |
| $\omega_3 a$    | 2727 <b>18</b>         | 2743 <b>21</b>         |
| $\omega_4 a$    | 2477 <b>955</b>        | 2458 <b>1076</b>       |
| $\omega_5 a$    | 2418 <b>529</b>        | 2390 <b>593</b>        |
| $\omega_6 a$    | 2349 <b>764</b>        | 2319 <b>818</b>        |
| $\omega_7 a$    | 1189 <b>5</b>          | 1206 <b>3</b>          |
| $\omega_8 a$    | 1186 <b>10</b>         | 1202 <b>11</b>         |
| $\omega_9 a$    | 1184 <b>11</b>         | 1200 <b>11</b>         |
| $\omega_{10} a$ | 520 <b>9</b>           | 524 <b>8</b>           |
| $\omega_{11} a$ | 491 <b>9</b>           | 512 <b>8</b>           |
| $\omega_{12} a$ | 461 <b>7</b>           | 488 <b>6</b>           |
| $\omega_{13} a$ | 298 <b>7</b>           | 294 <b>7</b>           |
| $\omega_{14} a$ | 278 <b>5</b>           | 284 <b>8</b>           |
| $\omega_{15} a$ | 266 <b>9</b>           | 280 <b>5</b>           |
| $\omega_{16} a$ | 259 <b>2</b>           | 266 <b>1</b>           |
| $\omega_{17} a$ | 191 <b>6</b>           | 183 <b>6</b>           |
| $\omega_{18} a$ | 161 <b>45</b>          | 170 <b>46</b>          |
| $\omega_{19} a$ | 137 <b>12</b>          | 137 <b>13</b>          |
| $\omega_{20} a$ | 116 <b>19</b>          | 120 <b>20</b>          |
| $\omega_{21} a$ | 113 <b>15</b>          | 117 <b>15</b>          |
| $\omega_{22} a$ | 70 <b>2</b>            | 69 <b>2</b>            |
| $\omega_{23} a$ | 58 <b>1</b>            | 55 <b>&lt;1</b>        |
| $\omega_{24} a$ | 25 <b>1</b>            | 27 <b>1</b>            |

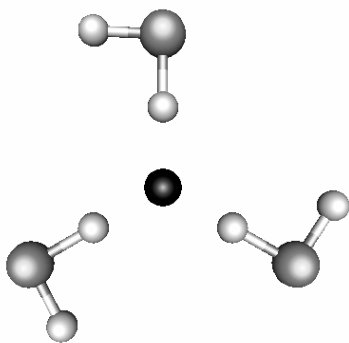

$C_{3h}$  symmetry, six imaginary frequencies ( $2a'' + 2e' + 2e''$ )

|                   | MP2/aug-cc-pvdz         | MP2/aug-cc-pvtz         |
|-------------------|-------------------------|-------------------------|
| $\omega_1 a'$     | 2765 <b>0</b>           | 2782 <b>0</b>           |
| $\omega_2 a'$     | 2445 <b>0</b>           | 2422 <b>0</b>           |
| $\omega_3 a'$     | 1187 <b>0</b>           | 1204 <b>0</b>           |
| $\omega_4 a'$     | 247 <b>0</b>            | 261 <b>0</b>            |
| $\omega_5 a'$     | 99 <b>0</b>             | 107 <b>0</b>            |
| $\omega_6 a''$    | 465 <b>10</b>           | 491 <b>7</b>            |
| $\omega_7 a''$    | 7i <b>2</b>             | 7i <b>1</b>             |
| $\omega_8 a''$    | 54i <b>31</b>           | 54i <b>29</b>           |
| $\omega_9 e'$     | 2765 <b>4</b>           | 2782 <b>1 (2)</b>       |
| $\omega_{10} e'$  | 2383 <b>1871 (3742)</b> | 2349 <b>2112 (4224)</b> |
| $\omega_{11} e'$  | 1193 <b>6 (12)</b>      | 1209 <b>8 (16)</b>      |
| $\omega_{12} e'$  | 252 <b>16 (32)</b>      | 266 <b>14 (28)</b>      |
| $\omega_{13} e'$  | 138 <b>59 (118)</b>     | 149 <b>64 (128)</b>     |
| $\omega_{14} e'$  | 7 <b>&lt;1 (1)</b>      | 3i <b>&lt;1 (1)</b>     |
| $\omega_{15} e''$ | 473 <b>0</b>            | 496 <b>0</b>            |
| $\omega_{16} e''$ | 26i <b>0</b>            | 27i <b>0</b>            |

|             | $r(Cl-H_b)$ | $r(S-H_b)$ | $r(S-H_t)$ | $\theta(Cl-H_b-S)$ | $\theta(H-S-H)$ | $\theta(H_b-Cl-H_b)$ | $zpe$ | $E_{MP2}$    | $E_e/BSSE$   | $\Delta E_e/BSSE$ | $\Delta E_e/BSSE/Corr$ |
|-------------|-------------|------------|------------|--------------------|-----------------|----------------------|-------|--------------|--------------|-------------------|------------------------|
| <i>pvdz</i> | 2.221       | 1.379      | 1.349      | 177.3              | 92.5            | 120.0                | 30.9  | -1656.372481 | -1656.332070 | 2.6               | 1.1                    |
| <i>pvtz</i> | 2.174       | 1.370      | 1.336      | 177.6              | 92.3            | 120.0                | 31.1  | -1656.563519 | -1656.559811 | 3.2               | 1.8                    |

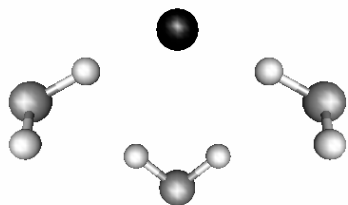

$C_s$  symmetry, one imaginary frequency ( $a''$ )

H<sub>2</sub>Ss bound to anion

|             | $r(Cl...H_b)$ | $r(S-H_b)$ | $r(S-H_t)$ | $\theta(Cl-H_b-S)$ | $\theta(H-S-H)$ | $\theta(H_b-Cl-H_b)$ | $zpe$ | $E_{MP2}$    | $E_{e/BSSE}$ | $\Delta E_{e/BSSE}$ | $\Delta E_{e/BSSE/Corr}$ |
|-------------|---------------|------------|------------|--------------------|-----------------|----------------------|-------|--------------|--------------|---------------------|--------------------------|
| <i>pvdz</i> | 2.116         | 1.391      | 1.350      | 175.6              | 92.5            | 131.5                | 31.4  | -1656.337462 | -1656.330919 | 3.4                 | 2.4                      |
| <i>pvtz</i> | 2.085         | 1.382      | 1.337      | 175.8              | 92.3            | 130.4                | 31.5  | -1656.563325 | -1656.559170 | 3.6                 | 2.6                      |

Satellite H<sub>2</sub>S

|             | $r(S...H_b)$ | $r(S-H_b)$ | $\theta(H-S-H)$ |
|-------------|--------------|------------|-----------------|
| <i>pvdz</i> | 2.749        | 1.354      | 169.6           |
| <i>pvtz</i> | 2.779        | 1.341      | 163.4           |

HS<sub>2</sub>...SH<sub>2</sub> Hbond angles

169.6° (*apvdz*)

163.4° (*apvtz*)

|                   | <i>MP2/aug-cc-pvdz</i> | <i>MP2/aug-cc-pvdz</i> |
|-------------------|------------------------|------------------------|
| $\omega_1 a'$     | 2759 <b>3</b>          | 2777 <b>1</b>          |
| $\omega_2 a'$     | 2704 <b>81</b>         | 2722 <b>84</b>         |
| $\omega_3 a'$     | 2288 <b>485</b>        | 2269 <b>522</b>        |
| $\omega_4 a'$     | 1180 <b>6</b>          | 1199 <b>8</b>          |
| $\omega_5 a'$     | 1164 <b>3</b>          | 1169 <b>2</b>          |
| $\omega_6 a'$     | 545 <b>5</b>           | 561 <b>5</b>           |
| $\omega_7 a'$     | 339 <b>5</b>           | 339 <b>4</b>           |
| $\omega_8 a'$     | 265 <b>14</b>          | 285 <b>15</b>          |
| $\omega_9 a'$     | 131 <b>17</b>          | 142 <b>16</b>          |
| $\omega_{10} a'$  | 113 <b>27</b>          | 118 <b>30</b>          |
| $\omega_{11} a'$  | 77 < <b>1</b>          | 74 < <b>1</b>          |
| $\omega_{12} a'$  | 26 <b>2</b>            | 33 <b>1</b>            |
| $\omega_{13} a'$  | 11 <b>1</b>            | 7 <b>1</b>             |
| $\omega_{14} a''$ | 2759 <b>1</b>          | 2777 <b>1</b>          |
| $\omega_{15} a''$ | 2720 <b>137</b>        | 2773 <b>113</b>        |
| $\omega_{16} a''$ | 2205 <b>2759</b>       | 2179 <b>2908</b>       |
| $\omega_{17} a''$ | 1184 < <b>1</b>        | 1200 < <b>1</b>        |
| $\omega_{18} a''$ | 544 <b>21</b>          | 568 <b>19</b>          |
| $\omega_{19} a''$ | 315 < <b>1</b>         | 300 < <b>1</b>         |
| $\omega_{20} a''$ | 269 <b>2</b>           | 285 <b>1</b>           |
| $\omega_{21} a''$ | 157 <b>105</b>         | 168 <b>109</b>         |
| $\omega_{22} a''$ | 98 <b>1</b>            | 90 < <b>1</b>          |
| $\omega_{23} a''$ | 72 <b>1</b>            | 56 < <b>1</b>          |
| $\omega_{24} a''$ | 87i <b>19</b>          | 147i <b>17</b>         |

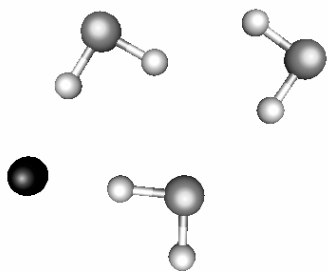

$C_s$  symmetry, two imaginary frequencies ( $2a''$ )

|             | $r(Cl...H_b)$                    | $r(S-H_b)$     | $r(S-H_t)$     | $\theta(Cl-H_b-S)$ | $\theta(H-S-H)$ | $\theta(H_b-Cl-H_b)$ | $zpe$ | $E_{MP2}$    | $E_{e/BSSE}$ | $\Delta E_{e/BSSE}$ | $\Delta E_{e/BSSE/Corr}$ |
|-------------|----------------------------------|----------------|----------------|--------------------|-----------------|----------------------|-------|--------------|--------------|---------------------|--------------------------|
| <i>pvdz</i> | 2.174 <i>t</i><br>2.057 <i>b</i> | 1.386<br>1.403 | 1.350<br>1.348 | 172.8<br>178.1     | 91.7<br>93.9    | 73.8                 | 30.9  | -1656.330581 | -1656.324331 | 7.5                 | 6.0                      |
| <i>pvtz</i> | 2.130 <i>t</i><br>2.019 <i>b</i> | 1.378<br>1.397 | 1.337<br>1.336 | 172.8<br>178.0     | 91.6<br>93.7    | 73.5                 | 31.1  | -1656.556559 | -1656.552479 | 7.8                 | 6.4                      |

$t=top, b=bottom$

Satellite H<sub>2</sub>S

|             | $r(S...H_b)$                     | $r(S-H_b)$     | $\theta(H-S-H)$ |
|-------------|----------------------------------|----------------|-----------------|
| <i>pvdz</i> | 3.398 <i>l</i><br>2.665 <i>b</i> | 1.350<br>1.354 | 92.3            |
| <i>pvtz</i> | 3.252 <i>l</i><br>2.639 <i>b</i> | 1.337<br>1.343 | 92.2            |

HSH...SH<sub>2</sub> Hbond angles

140.3° *s-t* (apvdz)

139.2° *s-t* (apvtz)

168.7° *s-b* (apvdz)

169.4° *s-b* (apvtz)

|                   | <i>MP2/aug-cc-pvdz</i> | <i>MP2/aug-cc-pvdz</i> |
|-------------------|------------------------|------------------------|
| $\omega_1 a'$     | 2767 <b>4</b>          | 2780 <b>3</b>          |
| $\omega_2 a'$     | 2762 <b>3</b>          | 2775 <b>2</b>          |
| $\omega_3 a'$     | 2761 <b>2</b>          | 2774 <b>1</b>          |
| $\omega_4 a'$     | 2710 <b>98</b>         | 2714 <b>118</b>        |
| $\omega_5 a'$     | 2324 <b>1411</b>       | 2289 <b>1577</b>       |
| $\omega_6 a'$     | 2080 <b>1822</b>       | 2031 <b>1918</b>       |
| $\omega_7 a'$     | 1206 <b>11</b>         | 1224 <b>13</b>         |
| $\omega_8 a'$     | 1192 <b>7</b>          | 1212 <b>8</b>          |
| $\omega_9 a'$     | 1175 <b>1</b>          | 1192 <b>&lt;1</b>      |
| $\omega_{10} a'$  | <b>314</b> 8           | 340 <b>8</b>           |
| $\omega_{11} a'$  | 306 <b>17</b>          | 326 <b>16</b>          |
| $\omega_{12} a'$  | 171 <b>3</b>           | 189 <b>2</b>           |
| $\omega_{13} a'$  | 170 <b>67</b>          | 184 <b>72</b>          |
| $\omega_{14} a'$  | 123 <b>38</b>          | 132 <b>39</b>          |
| $\omega_{15} a'$  | 78 <b>8</b>            | 80 <b>7</b>            |
| $\omega_{16} a'$  | 49 <b>3</b>            | 52 <b>3</b>            |
| $\omega_{17} a'$  | 36 <b>&lt;1</b>        | 35 <b>&lt;1</b>        |
| $\omega_{18} a''$ | 544 <b>2</b>           | 574 <b>1</b>           |
| $\omega_{19} a''$ | 486 <b>1</b>           | 511 <b>1</b>           |
| $\omega_{20} a''$ | 229 <b>2</b>           | 243 <b>2</b>           |
| $\omega_{21} a''$ | 91 <b>4</b>            | 91 <b>2</b>            |
| $\omega_{22} a''$ | 16 <b>4</b>            | 19 <b>4</b>            |
| $\omega_{23} a''$ | 175i <b>19</b>         | 154i <b>17</b>         |
| $\omega_{24} a''$ | 205i <b>8</b>          | 213i <b>7</b>          |

# Pentamer Structures: Cl<sup>-</sup>-(H<sub>2</sub>S)<sub>4</sub>



*C*<sub>1</sub> symmetry, minimum

|             | <i>r</i> (Cl-H <sub>b</sub> ) | <i>r</i> (S-H <sub>b</sub> ) | <i>r</i> (S-H <sub>l</sub> ) | $\theta$ (Cl-H <sub>b</sub> -S) | $\theta$ (H-S-H) | $\theta$ (H <sub>b</sub> -Cl-H <sub>b</sub> ) | <i>zpe</i> | <i>E</i> <sub>MP2</sub> | <i>E</i> <sub><i>e</i>/BSSE</sub> | $\Delta E_{e/BSSE}$ | $\Delta E_{e/BSSE/Corr}$ | $\Delta H_3^{295K}$ |
|-------------|-------------------------------|------------------------------|------------------------------|---------------------------------|------------------|-----------------------------------------------|------------|-------------------------|-----------------------------------|---------------------|--------------------------|---------------------|
| <i>pvdz</i> | 2.300 <i>l</i>                | 1.370                        | 1.352                        | 168.5                           | 91.2             | 73.2 <i>l-f</i>                               | 43.3       | -2055.213566            | -2055.203332                      | 0.0                 | 0.0                      | -7.4                |
|             | 2.286 <i>f</i>                | 1.375                        | 1.355                        | 165.9                           | 90.8             | 73.8 <i>f-b</i>                               |            |                         |                                   |                     |                          | Checked             |
|             | 2.319 <i>b</i>                | 1.371                        | 1.354                        | 165.8                           | 90.9             | 73.9 <i>b-r</i>                               |            |                         |                                   |                     |                          |                     |
|             | 2.284 <i>r</i>                | 1.373                        | 1.353                        | 168.5                           | 91.1             | 135.5 <i>r-l</i>                              |            |                         |                                   |                     |                          |                     |

*l*=left, *f*=front, *b*=back, *r*=right

HSH...SH<sub>2</sub> Hbond angle = 138.9° *l-f*  
 143.6° *f-b*  
 139.3° *b-r*  
 138.6° *r-f*

|                 | MP2/ <i>aug-cc-pvdz</i> |
|-----------------|-------------------------|
| $\omega_1 a$    | 2739 <b>10</b>          |
| $\omega_2 a$    | 2732 <b>18</b>          |
| $\omega_3 a$    | 2725 <b>15</b>          |
| $\omega_4 a$    | 2708 <b>30</b>          |
| $\omega_5 a$    | 2542 <b>566</b>         |
| $\omega_6 a$    | 2494 <b>500</b>         |
| $\omega_7 a$    | 2469 <b>688</b>         |
| $\omega_8 a$    | 2447 <b>301</b>         |
| $\omega_9 a$    | 1188 <b>13</b>          |
| $\omega_{10} a$ | 1187 <b>7</b>           |
| $\omega_{11} a$ | 1186 <b>11</b>          |
| $\omega_{12} a$ | 1182 <b>4</b>           |
| $\omega_{13} a$ | 502 <b>14</b>           |
| $\omega_{14} a$ | 473 <b>6</b>            |
| $\omega_{15} a$ | 467 <b>8</b>            |
| $\omega_{16} a$ | 431 <b>8</b>            |
| $\omega_{17} a$ | 360 <b>3</b>            |
| $\omega_{18} a$ | 276 <b>7</b>            |
| $\omega_{19} a$ | 263 < <b>1</b>          |
| $\omega_{20} a$ | 254 <b>6</b>            |
| $\omega_{21} a$ | 249 <b>6</b>            |
| $\omega_{22} a$ | 237 <b>6</b>            |
| $\omega_{23} a$ | 217 <b>12</b>           |
| $\omega_{24} a$ | 181 <b>8</b>            |
| $\omega_{25} a$ | 155 <b>31</b>           |
| $\omega_{26} a$ | 138 <b>39</b>           |
| $\omega_{27} a$ | 109 <b>11</b>           |
| $\omega_{28} a$ | 92 < <b>1</b>           |
| $\omega_{29} a$ | 79 <b>2</b>             |
| $\omega_{30} a$ | 70 <b>1</b>             |
| $\omega_{31} a$ | 61 <b>1</b>             |
| $\omega_{32} a$ | 48 <b>1</b>             |
| $\omega_{33} a$ | 24 <b>1</b>             |

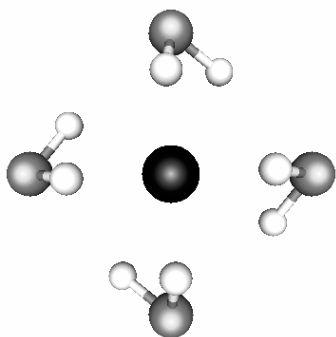

$C_4$  symmetry, minimum

|             | $r(Cl-H_b)$ | $r(S-H_b)$ | $r(S-H_t)$ | $\theta(Cl-H_b-S)$ | $\theta(H-S-H)$ | $\theta(H_b-Cl-H_b)$ | $zpe$ | $E_{MP2}$    | $E_e/BSSE$   | $\Delta E_e/BSSE$ | $\Delta E_e/BSSE/Corr$ |
|-------------|-------------|------------|------------|--------------------|-----------------|----------------------|-------|--------------|--------------|-------------------|------------------------|
| <i>pvdz</i> | 2.298       | 1.372      | 1.353      | 168.1              | 91.0            | 70.5                 | 43.5  | -2055.213351 | -2055.203272 | <0.1              | 0.2                    |

HSH...SH<sub>2</sub> Hbond angle = 139.0°

|                 | <i>MP2/aug-cc-pvdz</i> |
|-----------------|------------------------|
| $\omega_1 a$    | 2727 <b>1</b>          |
| $\omega_2 a$    | 2535 <b>625</b>        |
| $\omega_3 a$    | 1181 <b>12</b>         |
| $\omega_4 a$    | 473 <b>1</b>           |
| $\omega_5 a$    | 344 <b>5</b>           |
| $\omega_6 a$    | 267 <b>11</b>          |
| $\omega_7 a$    | 151 <b>25</b>          |
| $\omega_8 a$    | 63 <b>2</b>            |
| $\omega_9 b$    | 2733 <b>0</b>          |
| $\omega_{10} b$ | 2467 <b>0</b>          |
| $\omega_{11} b$ | 1197 <b>0</b>          |
| $\omega_{12} b$ | 489 <b>0</b>           |
| $\omega_{13} b$ | 264 <b>0</b>           |
| $\omega_{14} b$ | 163 <b>0</b>           |
| $\omega_{15} b$ | 90 <b>0</b>            |
| $\omega_{16} b$ | 72 <b>0</b>            |
| $\omega_{17} b$ | 17 <b>0</b>            |
| $\omega_{18} e$ | 2730 <b>44 (88)</b>    |
| $\omega_{19} e$ | 2473 <b>720 (1440)</b> |
| $\omega_{20} e$ | 1188 <b>13 (26)</b>    |
| $\omega_{21} e$ | 477 <b>19 (38)</b>     |
| $\omega_{22} e$ | 262 <b>1 (2)</b>       |
| $\omega_{23} e$ | 255 <b>7 (14)</b>      |
| $\omega_{24} e$ | 128 <b>29 (58)</b>     |
| $\omega_{25} e$ | 69 <b>2 (4)</b>        |



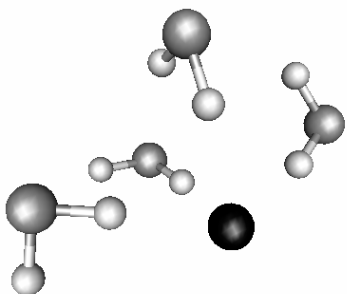

$C_s$  symmetry, minimum

|             | $r(Cl-H_b)$    | $r(S-H_b)$ | $r(S-H_t)$ | $\theta(Cl-H_b-S)$ | $\theta(H-S-H)$ | $\theta(H_b-Cl-H_b)$ | $zpe$ | $E_{MP2}$    | $E_{e/BSSE}$ | $\Delta E_{e/BSSE}$ | $\Delta E_{e/BSSE/Corr}$ |
|-------------|----------------|------------|------------|--------------------|-----------------|----------------------|-------|--------------|--------------|---------------------|--------------------------|
| <i>pvdz</i> | 2.242 <i>l</i> | 1.376      | 1.350      | 174.0              | 92.1            | 73.2 <i>l-b</i>      | 43.1  | -2055.211775 | -2055.201920 | 0.9                 | 0.7                      |
|             | 2.333 <i>b</i> | 1.370      | 1.353      | 165.3              | 91.0            | 73.9 <i>b-t</i>      |       |              |              |                     |                          |
|             | 2.295 <i>t</i> | 1.372      | 1.354      | 165.9              | 90.9            | 73.1 <i>t-r</i>      |       |              |              |                     |                          |
|             | 2.309 <i>r</i> | 1.369      | 1.352      | 167.9              | 91.1            | 133.3 <i>r-l</i>     |       |              |              |                     |                          |

HSH...SH<sub>2</sub> Hbond angle = 140.8° *b-l*  
 143.7° *t-b*  
 139.9° *r-t*

|                 | <i>MP2/aug-cc-pvdz</i> |
|-----------------|------------------------|
| $\omega_1 a$    | 2757 <b>3</b>          |
| $\omega_2 a$    | 2736 <b>15</b>         |
| $\omega_3 a$    | 2726 <b>22</b>         |
| $\omega_4 a$    | 2717 <b>25</b>         |
| $\omega_5 a$    | 2550 <b>582</b>        |
| $\omega_6 a$    | 2506 <b>438</b>        |
| $\omega_7 a$    | 2483 <b>349</b>        |
| $\omega_8 a$    | 2425 <b>813</b>        |
| $\omega_9 a$    | 1191 <b>6</b>          |
| $\omega_{10} a$ | 1188 <b>10</b>         |
| $\omega_{11} a$ | 1187 <b>7</b>          |
| $\omega_{12} a$ | 1184 <b>7</b>          |
| $\omega_{13} a$ | 493 <b>8</b>           |
| $\omega_{14} a$ | 472 <b>11</b>          |
| $\omega_{15} a$ | 460 <b>7</b>           |
| $\omega_{16} a$ | 425 <b>9</b>           |
| $\omega_{17} a$ | 332 <b>8</b>           |
| $\omega_{18} a$ | 266 <b>7</b>           |
| $\omega_{19} a$ | 258 <b>3</b>           |
| $\omega_{20} a$ | 255 <b>5</b>           |
| $\omega_{21} a$ | 243 <b>3</b>           |
| $\omega_{22} a$ | 234 <b>5</b>           |
| $\omega_{23} a$ | 187 <b>8</b>           |
| $\omega_{24} a$ | 153 <b>30</b>          |
| $\omega_{25} a$ | 139 <b>36</b>          |
| $\omega_{26} a$ | 133 <b>17</b>          |
| $\omega_{27} a$ | 109 <b>10</b>          |
| $\omega_{28} a$ | 92 <b>&lt;1</b>        |
| $\omega_{29} a$ | 75 <b>2</b>            |
| $\omega_{30} a$ | 65 <b>1</b>            |
| $\omega_{31} a$ | 57 <b>&lt;1</b>        |
| $\omega_{32} a$ | 27 <b>&lt;1</b>        |
| $\omega_{33} a$ | 20 <b>1</b>            |

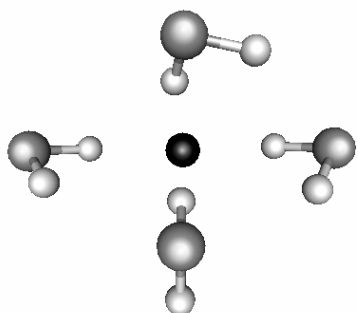

$C_1$  symmetry, minimum

|             | $r(\text{Cl}-\text{H}_b)$ | $r(\text{S}-\text{H}_b)$ | $r(\text{S}-\text{H}_t)$ | $\theta(\text{Cl}-\text{H}_b-\text{S})$ | $\theta(\text{H}-\text{S}-\text{H})$ | $\theta(\text{H}_b-\text{Cl}-\text{H}_b)$ | $zpe$ | $E_{MP2}$    | $E_e/BSSE$   | $\Delta E_e/BSSE$ | $\Delta E_e/BSSE/Corr$ |
|-------------|---------------------------|--------------------------|--------------------------|-----------------------------------------|--------------------------------------|-------------------------------------------|-------|--------------|--------------|-------------------|------------------------|
| <i>pvdz</i> | 2.311 <i>l</i>            | 1.369                    | 1.352                    | 168.2                                   | 91.3                                 | 72.1 <i>l-f</i>                           | 43.1  | -2055.211473 | -2055.201698 | 1.0               | 0.8                    |
|             | 2.230 <i>f</i>            | 1.378                    | 1.351                    | 178.4                                   | 92.1                                 | 71.8 <i>f-r</i>                           |       |              |              |                   |                        |
|             | 2.299 <i>r</i>            | 1.372                    | 1.353                    | 168.1                                   | 91.1                                 | 74.8 <i>r-t</i>                           |       |              |              |                   |                        |
|             | 2.331 <i>t</i>            | 1.368                    | 1.353                    | 164.4                                   | 91.0                                 | 69.8 <i>t-l</i>                           |       |              |              |                   |                        |

HSH...SH<sub>2</sub> Hbond angle = 138.1° *l-f*  
 140.8° *t-r*  
 138.7° *r-f*

|                 | <i>MP2/aug-cc-pvdz</i> |
|-----------------|------------------------|
| $\omega_1 a$    | 2752 <b>4</b>          |
| $\omega_2 a$    | 2741 <b>9</b>          |
| $\omega_3 a$    | 2733 <b>20</b>         |
| $\omega_4 a$    | 2730 <b>8</b>          |
| $\omega_5 a$    | 2559 <b>521</b>        |
| $\omega_6 a$    | 2516 <b>309</b>        |
| $\omega_7 a$    | 2484 <b>798</b>        |
| $\omega_8 a$    | 2402 <b>508</b>        |
| $\omega_9 a$    | 1193 <b>2</b>          |
| $\omega_{10} a$ | 1190 <b>13</b>         |
| $\omega_{11} a$ | 1187 <b>8</b>          |
| $\omega_{12} a$ | 1183 <b>1</b>          |
| $\omega_{13} a$ | 524 <b>11</b>          |
| $\omega_{14} a$ | 461 <b>9</b>           |
| $\omega_{15} a$ | 434 <b>2</b>           |
| $\omega_{16} a$ | 417 <b>13</b>          |
| $\omega_{17} a$ | 310 <b>7</b>           |
| $\omega_{18} a$ | 265 <b>17</b>          |
| $\omega_{19} a$ | 260 <b>7</b>           |
| $\omega_{20} a$ | 253 <b>3</b>           |
| $\omega_{21} a$ | 243 <b>1</b>           |
| $\omega_{22} a$ | 216 <b>6</b>           |
| $\omega_{23} a$ | 207 <b>13</b>          |
| $\omega_{24} a$ | 156 <b>34</b>          |
| $\omega_{25} a$ | 140 <b>3</b>           |
| $\omega_{26} a$ | 136 <b>37</b>          |
| $\omega_{27} a$ | 107 <b>9</b>           |
| $\omega_{28} a$ | 89 <b>1</b>            |
| $\omega_{29} a$ | 72 <b>2</b>            |
| $\omega_{30} a$ | 63 <b>&lt;1</b>        |
| $\omega_{31} a$ | 52 <b>1</b>            |
| $\omega_{32} a$ | 41 <b>1</b>            |
| $\omega_{33} a$ | 21 <b>1</b>            |

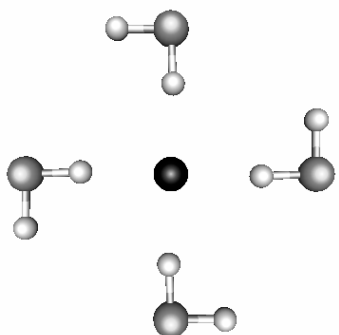

$C_{4h}$  symmetry, eight imaginary frequencies ( $2a_u, b_g, b_u, 2e_g, 2e_u$ )

|             | $r(Cl-H_b)$ | $r(S-H_b)$ | $r(S-H_t)$ | $\theta(Cl-H_b-S)$ | $\theta(H-S-H)$ | $\theta(H_b-Cl-H_b)$ | $zpe$ | $E_{MP2}$    | $E_e/BSSE$   | $\Delta E_e/BSSE$ | $\Delta E_e/BSSE/Corr$ |
|-------------|-------------|------------|------------|--------------------|-----------------|----------------------|-------|--------------|--------------|-------------------|------------------------|
| <i>pvdz</i> | 2.265       | 1.373      | 1.350      | 176.5              | 92.4            | 90.0                 | 41.2  | -2055.204480 | -2055.197709 | 3.5               | 1.4                    |

|                   | <i>MP2/aug-cc-pvdz</i>  |
|-------------------|-------------------------|
| $\omega_1 a_g$    | 2763 <b>0</b>           |
| $\omega_2 a_g$    | 2523 <b>0</b>           |
| $\omega_3 a_g$    | 1186 <b>0</b>           |
| $\omega_4 a_g$    | 226 <b>0</b>            |
| $\omega_5 a_g$    | 95 <b>0</b>             |
| $\omega_6 a_u$    | 421 <b>12</b>           |
| $\omega_7 a_u$    | 51i <b>1</b>            |
| $\omega_8 a_u$    | 103i <b>40</b>          |
| $\omega_9 b_g$    | 2763 <b>0</b>           |
| $\omega_{10} b_g$ | 2463 <b>0</b>           |
| $\omega_{11} b_g$ | 1199 <b>0</b>           |
| $\omega_{12} b_g$ | 232 <b>0</b>            |
| $\omega_{13} b_g$ | 86 <b>0</b>             |
| $\omega_{14} b_g$ | 16i <b>0</b>            |
| $\omega_{15} b_u$ | 401 <b>0</b>            |
| $\omega_{16} b_u$ | 52 <b>0</b>             |
| $\omega_{17} b_u$ | 10i <b>0</b>            |
| $\omega_{18} e_g$ | 434 <b>0</b>            |
| $\omega_{19} e_g$ | 62i <b>0</b>            |
| $\omega_{20} e_u$ | 2763 <b>4 (8)</b>       |
| $\omega_{21} e_u$ | 2458 <b>1851 (3702)</b> |
| $\omega_{22} e_u$ | 1188 <b>3 (6)</b>       |
| $\omega_{23} e_u$ | 220 <b>28 (56)</b>      |
| $\omega_{24} e_u$ | 146 <b>60 (120)</b>     |
| $\omega_{25} e_u$ | 17i <b>&lt;1 (1)</b>    |

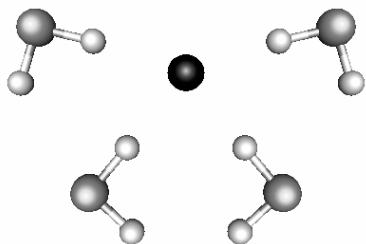

$C_{2v}$  symmetry, three imaginary frequencies ( $2a_2 + b_1$ )

|             | $r(Cl-H_b)$                      | $r(S-H_b)$     | $r(S-H_t)$     | $\theta(Cl-H_b-S)$ | $\theta(H-S-H)$ | $\theta(H_b-Cl-H_b)$                                   | $zpe$ | $E_{MP2}$    | $E_e/BSSE$   | $\Delta E_e/BSSE$ | $\Delta E_e/BSSE/Corr$ |
|-------------|----------------------------------|----------------|----------------|--------------------|-----------------|--------------------------------------------------------|-------|--------------|--------------|-------------------|------------------------|
| <i>pvdz</i> | 2.304 <i>t</i><br>2.243 <i>b</i> | 1.370<br>1.376 | 1.350<br>1.349 | 174.7<br>178.4     | 92.5<br>92.9    | 142.6 <i>t-t</i><br>70.6 <i>t-b</i><br>76.2 <i>b-b</i> | 41.8  | -2055.205910 | -2055.197630 | 3.6               | 2.1                    |

*t*=top, *b*=bottom.

HSH...SH<sub>2</sub> Hbond angle = 132.0° (apvdz)

|                   | <i>MP2/aug-cc-pvdz</i> |
|-------------------|------------------------|
| $\omega_1 a_1$    | 2767 <b>4</b>          |
| $\omega_2 a_1$    | 2759 <b>1</b>          |
| $\omega_3 a_1$    | 2536 <b>1</b>          |
| $\omega_4 a_1$    | 2438 <b>1105</b>       |
| $\omega_5 a_1$    | 1211 <b>1</b>          |
| $\omega_6 a_1$    | 1193 < <b>1</b>        |
| $\omega_7 a_1$    | 284 <b>40</b>          |
| $\omega_8 a_1$    | 263 <b>4</b>           |
| $\omega_9 a_1$    | 139 <b>34</b>          |
| $\omega_{10} a_1$ | 95 <b>2</b>            |
| $\omega_{11} a_1$ | 53 < <b>1</b>          |
| $\omega_{12} a_1$ | 29 <b>1</b>            |
| $\omega_{13} a_2$ | 442 <b>0</b>           |
| $\omega_{14} a_2$ | 395 <b>0</b>           |
| $\omega_{15} a_2$ | 59 <b>0</b>            |
| $\omega_{16} a_2$ | 28i <b>0</b>           |
| $\omega_{17} a_2$ | 196i <b>0</b>          |
| $\omega_{18} b_1$ | 451 <b>4</b>           |
| $\omega_{19} b_1$ | 407 <b>4</b>           |
| $\omega_{20} b_1$ | 107 <b>1</b>           |
| $\omega_{21} b_1$ | 3 <b>1</b>             |
| $\omega_{22} b_1$ | 137i <b>36</b>         |
| $\omega_{23} b_2$ | 2764 <b>6</b>          |
| $\omega_{24} b_2$ | 2759 < <b>1</b>        |
| $\omega_{25} b_2$ | 2496 <b>1489</b>       |
| $\omega_{26} b_2$ | 2415 <b>677</b>        |
| $\omega_{27} b_2$ | 1204 <b>4</b>          |
| $\omega_{28} b_2$ | 1185 < <b>1</b>        |
| $\omega_{29} b_2$ | 261 <b>15</b>          |
| $\omega_{30} b_2$ | 255 < <b>1</b>         |
| $\omega_{31} b_2$ | 157 <b>91</b>          |
| $\omega_{32} b_2$ | 85 < <b>1</b>          |
| $\omega_{33} b_2$ | 49 <b>1</b>            |
